# Supplementary material for: Use of infographics as a health-related knowledge translation tool: protocol for a scoping review
Source: PubMed Central journal article supplement — BMJ Open. 2021 Jun 16;11(6):e046117. doi: 10.1136/bmjopen-2020-046117 (PMC8211040; doi:10.1136/bmjopen-2020-046117), 2021-06-16
Supplement: bmjopen-2020-046117.draft_revisions.pdf [file bmjopen-2020-046117.draft_revisions.pdf]

# BMJ Open

BMJ Open is committed to open peer review. As part of this commitment we make the peer review history of every article we publish publicly available.

When an article is published we post the peer reviewers' comments and the authors' responses online. We also post the versions of the paper that were used during peer review. These are the versions that the peer review comments apply to.

The versions of the paper that follow are the versions that were submitted during the peer review process. They are not the versions of record or the final published versions. They should not be cited or distributed as the published version of this manuscript.

BMJ Open is an open access journal and the full, final, typeset and author-corrected version of record of the manuscript is available on our site with no access controls, subscription charges or pay-per-view fees (<http://bmjopen.bmj.com>).

If you have any questions on BMJ Open's open peer review process please email [info.bmjopen@bmj.com](mailto:info.bmjopen@bmj.com)

# BMJ Open

## The use of infographics as a health-related knowledge translation tool: protocol for a scoping review

|                               |                                                                                                                                                                                                                                                                                                                                                          |
|-------------------------------|----------------------------------------------------------------------------------------------------------------------------------------------------------------------------------------------------------------------------------------------------------------------------------------------------------------------------------------------------------|
| Journal:                      | <i>BMJ Open</i>                                                                                                                                                                                                                                                                                                                                          |
| Manuscript ID                 | bmjopen-2020-046117                                                                                                                                                                                                                                                                                                                                      |
| Article Type:                 | Protocol                                                                                                                                                                                                                                                                                                                                                 |
| Date Submitted by the Author: | 20-Oct-2020                                                                                                                                                                                                                                                                                                                                              |
| Complete List of Authors:     | Mc Sween-Cadieux, Esther; University of Montreal, Psychology<br>Chabot, Catherine; University of Montreal, Psychology<br>Fillol, Amandine; University of Montreal, School of Public Health; Institut de recherche pour le développement, CEPED - IRD-Université de Paris - ERL INSERM SAGESUD<br>Dagenais, Christian; University of Montreal, Psychology |
| Keywords:                     | SOCIAL MEDICINE, PUBLIC HEALTH, MEDICAL EDUCATION & TRAINING                                                                                                                                                                                                                                                                                             |
|                               |                                                                                                                                                                                                                                                                                                                                                          |

SCHOLARONE™  
Manuscripts

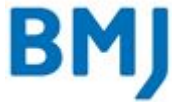

I, the Submitting Author has the right to grant and does grant on behalf of all authors of the Work (as defined in the below author licence), an exclusive licence and/or a non-exclusive licence for contributions from authors who are: i) UK Crown employees; ii) where BMJ has agreed a CC-BY licence shall apply, and/or iii) in accordance with the terms applicable for US Federal Government officers or employees acting as part of their official duties; on a worldwide, perpetual, irrevocable, royalty-free basis to BMJ Publishing Group Ltd ("BMJ") its licensees and where the relevant Journal is co-owned by BMJ to the co-owners of the Journal, to publish the Work in this journal and any other BMJ products and to exploit all rights, as set out in our [licence](#).

The Submitting Author accepts and understands that any supply made under these terms is made by BMJ to the Submitting Author unless you are acting as an employee on behalf of your employer or a postgraduate student of an affiliated institution which is paying any applicable article publishing charge ("APC") for Open Access articles. Where the Submitting Author wishes to make the Work available on an Open Access basis (and intends to pay the relevant APC), the terms of reuse of such Open Access shall be governed by a Creative Commons licence – details of these licences and which [Creative Commons](#) licence will apply to this Work are set out in our licence referred to above.

Other than as permitted in any relevant BMJ Author's Self Archiving Policies, I confirm this Work has not been accepted for publication elsewhere, is not being considered for publication elsewhere and does not duplicate material already published. I confirm all authors consent to publication of this Work and authorise the granting of this licence.

# 1 The use of infographics as a health-related knowledge translation tool: protocol for a scoping 2 review

3  
4 *Esther Mc Sween-Cadieux<sup>1</sup>, Catherine Chabot<sup>1</sup>, Amandine Fillo<sup>2,3</sup> & Christian Dagenais<sup>1</sup>*

## 5 6 **Author affiliations**

7 <sup>1</sup> Department of Psychology, University of Montreal, Montreal, Quebec, Canada

8 <sup>2</sup> School of Public Health, University of Montreal, Montreal, Quebec, Canada.

9 <sup>3</sup> CEPED, Institute for Research on Sustainable Development, IRD-Université de Paris, ERL  
10 INSERM SAGESUD, Paris, France

## 11 12 **Corresponding author**

13 Esther Mc Sween-Cadieux, Ph.D

14 [esther.mcsween-cadieux@umontreal.ca](mailto:esther.mcsween-cadieux@umontreal.ca)

15 ORCID iD - <https://orcid.org/0000-0001-5403-0035>

## 16 17 18 **ABSTRACT**

---

19  
20 **Introduction.** Efforts to bridge the *know-do gap* have paved the way for the development of the  
21 knowledge translation field (KT) which aims to understand how to promote and effectively  
22 support the use of evidence through different KT activities and strategies. As a dissemination  
23 activity, infographics are gaining more and more ground as a promising KT tool to reach multiple  
24 audiences (e.g., health practitioners, patients and families, decision makers). However, to our  
25 knowledge, no study has been conducted to map and synthesize the available data on this KT  
26 tool. Therefore, this scoping review will explore the depth and breadth of evidence about the  
27 use and effectiveness of infographics to improve knowledge uptake (e.g., raise awareness,  
28 influence attitudes, increase knowledge, inform practice, change behaviour, etc.) in health-  
29 related fields.

30 **Methods and analysis.** We will use the scoping review methodological framework first proposed  
31 by Arksey and O'Malley (2005), improved by Levac *et al.* (2010) and further refined by the  
32 Joanna Briggs Institute (2020). The search strategy will be conducted in MEDLINE, CINAHL,

1  
2 33 PsycInfo, Social Science Abstracts, LISA, ERIC, Cairn and Google Scholar. We will also search  
3  
4 34 for relevant literature from the reference list of the included articles. Study selection will be  
5  
6 35 conducted by two independent reviewers in two stages: 1) title and abstract screening and 2)  
7  
8 36 full-text screening. The included studies will have empirically evaluated an infographic that  
9  
10 37 disseminates research-based evidence and targets a non-scientific audience. A data extraction  
11  
12 38 form will be standardized and used to extract and chart the data. Afterward, the data will be  
13  
14 39 synthesized to present a descriptive summary of the results.

15 40 **Ethics and dissemination.** Ethics approval is not required. Our dissemination plan includes  
16  
17 41 publication in an open-access peer-reviewed journal, presentation in KT conference and  
18  
19 42 preparation of user-friendly KT tools distributed via social media (webinar, plain language  
20  
21 43 summary and infographic).  
22 44

## 23 45 **KEYWORDS**

---

25 46 Infographic, effectiveness, knowledge translation, knowledge uptake, scoping review  
26  
27 47  
28

### 29 48 **Strengths and limitations of this study**

30  
31 49 → This scoping review is the first known to synthesize literature on the use and effectiveness  
32  
33 50 of infographics as a knowledge translation intervention to improve knowledge uptake (e.g.,  
34  
35 51 raise awareness, influence attitudes, increase knowledge, inform practice, change behaviour,  
36  
37 52 etc.) in health-related fields.

38 53 → The results will be important to identify priorities for future research and to propose  
39  
40 54 recommendations for KT practice.

41 55 → We used an established and evidence-based scoping review framework to guide the  
42  
43 56 development of the protocol and we will use the PRISMA-ScR for reporting results.

44  
45 57 → This scoping will include an often-overlooked consultation exercise in order to add a  
46  
47 58 methodological rigour and enhance the validity and usefulness of the review results

48 59 → Although comprehensive, this scoping review has limitations: number of databases,  
49  
50 60 language (French and English), search terms used, focus of health-related fields and  
51  
52 61 empirical studies.

## 53 62 54 63 **BACKGROUND**

---

1  
2 64  
3

## 4 65 **Knowledge translation**

5  
6 66 Efforts to mobilize the phenomenal amount of research results and evidence-based information  
7  
8 67 have paved the way for the development of the knowledge translation field (KT) (1–3).  
9  
10 68 According to the *Canadian Institutes of Health Research*, KT is defined as « *a dynamic and*  
11 69 *iterative process that includes synthesis, dissemination, exchange and ethically-sound*  
12  
13 70 *application of knowledge* » to improve health, health services delivery and the health care  
14  
15 71 system (4). KT science aims to understand how to promote and effectively support the use of  
16  
17 72 evidence through different KT activities and strategies (5). The choice of activities will vary  
18  
19 73 according to the KT objective (e.g., raising awareness, improving action through a change in  
20  
21 74 practice among professionals, influence political decision-making, mobilize public action, etc.),  
22  
23 75 the knowledge users' needs, the implementation context and the nature and type of knowledge  
24  
25 76 to be shared (6).

26  
27 77

28  
29 78 In this study, our focus of interest will be on dissemination activities – also known as end-of  
30  
31 79 grant KT in Canada, which requires expertise in communications and vulgarization (1,7,8). The  
32  
33 80 primary goal of dissemination activities is to « *make new knowledge understandable and*  
34  
35 81 *accessible so as to effectively reach the groups of actors concerned* » (8). Studies show that  
36  
37 82 the passive dissemination of documents poorly suited to the preferences and characteristics of  
38  
39 83 the target audience is often ineffective (5,8,9). For this purpose, KT field emphasizes the  
40  
41 84 importance to develop dissemination tools that are attractive and adapted to users' preferences  
42  
43 85 (5). For example, dissemination activities may be a summary sheet or infographic, a practice  
44  
45 86 guide, a newsletter, brochures and leaflets, policy briefs, cartoons and videos, books, reports  
46  
47 87 and plain-language articles, etc. (8,10,11). Due to the knowledge translation movement,  
48  
49 88 research dissemination is no longer limited to peer-reviewed publications and scientific  
50  
51 89 conferences and now, more and more innovative and promising tools are used for knowledge  
52  
53 90 sharing. This project will specifically focus on one of these tools, namely infographics (12–14).

54  
55 91

## 56 92 **Infographics for knowledge translation**

57  
58 93 Infographics, an abbreviated term for *information graphic*- are increasingly popular in the digital  
59  
60 94 age in which we live. While no single definition of the term infographics has gained wide  
61  
62 95 acceptance, infographic is often understood as an eye-catching one-page document that uses

1  
2 96 striking and engaging visuals to communicate complex evidence-based information in an  
3  
4 97 attractive and easily understandable way (15–17). In other words, an infographic « *provides a*  
5  
6 98 *concise overview of a topic through visually representing information or data using graphics,*  
7  
8 99 *icons and/or images, with minimal words* » (18). An infographic also usually presents  
9  
10 100 information in a logical manner in order to tell a story (13,14).  
11 101

12  
13 102 Infographics are now everywhere and are used by many different industries: business,  
14  
15 103 environment, food, finance, politics and the healthcare sector (14). When infographics are used  
16  
17 104 for health communication purposes, it is expected that they capture users' attention, help them  
18  
19 105 better understand the information presented, increase their ability to retain and recall the  
20  
21 106 message and encourage users to act in accordance with the information (19). Infographics are  
22  
23 107 thus gaining more and more ground as a promising research or health information  
24  
25 108 dissemination tool to reach multiple potential knowledge users such as health practitioners,  
26  
27 109 patients and families, decision makers or community members. Several initiatives from the  
28  
29 110 research community aim to produce and distribute infographics in scientific journals or on social  
30  
31 111 media (e.g., Twitter, Facebook, LinkedIn, Pinterest, Instagram, etc.). Moreover, as a result of  
32  
33 112 the recent emergence of easy-to-use software for producing infographics, it appears that they  
34  
35 113 are now used as a go-to tool in different contexts, targeting different audiences, and using  
36  
37 114 different formats and designs. Thus, it is important to conduct studies on infographics in order  
38  
39 115 to better understand their real effectiveness to improve knowledge uptake and to highlight best  
40  
41 116 practices to design, produced and shared them. In this regard, more and more empirical studies  
42  
43 117 are carried out to experiment infographics as an intervention for disseminating research results  
44  
45 118 or evidence-based information (17,20–22).  
46  
47 119

## 44 120 **Purpose**

45  
46 121 However, to our knowledge, no study has been carried out to map the available evidence about  
47  
48 122 this tool. Thereby, our overarching goal is to explore the depth and breadth of evidence about  
49  
50 123 the use and effectiveness of infographics as a KT intervention to improve knowledge uptake  
51  
52 124 (e.g., raise awareness, influence attitudes, increase knowledge, inform practice, change  
53  
54 125 behaviour, etc.) in health-related fields. In order to achieve this, we will conduct a scoping  
55  
56 126 review as an evidence synthesis approach (23–25). This approach is recommended when the  
57  
58 127 purpose is, for example, to clarify key concepts and definitions in the literature, to identify key  
59  
60

1  
2 128 characteristic or factors related to a concept or to examine how research is conducted on a  
3  
4 129 certain topic (26). According to the Canadian Institutes of Health Research, a scoping review  
5  
6 130 is « *undertaken when feasibility is a concern - either because the potentially relevant literature*  
7  
8 131 *is thought to be especially vast and diverse (varying by method, theoretical orientation or*  
9  
9 132 *discipline) or there is a suspicion that not enough literature exists.* » (27). Therefore, a scoping  
10  
11 133 review is particularly useful to identify knowledge gaps in order to inform future research  
12  
13 134 priorities.

## 16 136 METHODS AND ANALYSIS

---

18 137  
19  
20 138 To guide the scoping review methodology, we will primarily use the scoping review  
21  
22 139 methodological framework first proposed by Arksey and O'Malley (2005) (23), improved by  
23  
24 140 Levac, Colquhoun and O'Brien (2010) (24) and further refined by the Joanna Briggs Institute  
25  
26 141 (2020) (25). A scoping review includes six key phases: (i) identifying the research questions;  
27 142 (ii) identifying relevant studies; (iii) selecting studies; (iv) charting the data; (v) collating,  
28  
29 143 summarizing and reporting the results and (vi) consulting with relevant stakeholders. We will  
30  
31 144 follow the *Preferred Reporting Items for Systematic Reviews and Meta-Analyses (PRISMA):*  
32 145 *Extension for scoping reviews checklist* to report this study results (28). Our scoping review  
33  
34 146 protocol is inspired and based on previous scoping reviews on similar KT activities and tools  
35  
36 147 (29,30).

### 39 149 Stage 1 | Identifying the research questions

41 150  
42  
43 151 The first stage in the process of conducting a scoping review is to identify research questions  
44  
45 152 related to the purpose of the study. As stated earlier, this scoping review aims to identify the  
46  
47 153 scope of evidence on the use of infographic as a KT intervention to disseminate research results  
48 154 or evidence-based information (in health-related sectors) to those who can benefit from these.  
49  
50 155 Table 1 describes the core elements of the scoping review using the Population-Concept-  
51  
52 156 Context (PCC) mnemonic (25). This is a more flexible alternative to the PICO (Population,  
53 157 Intervention, Comparator and Outcome) framework recommended for conducting systematic  
54  
55 158 reviews.



**Table 1 | PCC mnemonic to illustrate the scope and focus of the review**

|            |                                                                                                                                                                                                                 |
|------------|-----------------------------------------------------------------------------------------------------------------------------------------------------------------------------------------------------------------|
| Population | -Potential knowledge users (a non-scientific audience) such as health professionals, decision makers, patients and families, communities, etc.                                                                  |
| Concept    | -Infographic or any shareable tool that uses striking and engaging visuals to communicate complex evidence-based information in an easy-to-understand way                                                       |
| Context    | - The infographic intervention is used to promote and improve knowledge use (e.g., raise awareness, influence attitudes, increase knowledge, inform practice, change behaviour, etc.) in health-related sectors |

Four more specific research questions were identified to guide this review (see Figure 1). As the process of conducting a scoping review can be iterative, we will adopt a reflexive approach and research questions will be revised, if needed, as we will become more familiar with the body of evidence.

### Q1 | What do we know about the characteristics of infographic intervention?

First, given the uniqueness of each infographic tested, we will identify the main characteristics of each intervention: *content and visual appearance of the infographic, development process, infographic objective and the target audience and delivery method and context (e.g., online versus printed infographic, targeted mail or social media, infographic used alone versus or combined with other activities)*. The 7 G.R.A.P.H.I.C principles of public health infographic design (*e.g., coherence, colours, alignment, visual hierarchy, charts used, imagery, heading highlight*) will be used as a general framework to extract relevant data related to visual quality of infographic in selected study (12).

### Q2 | What do we know about the outcomes of infographic intervention?

Second, we will identify the available effectiveness data on the use of infographics as a KT intervention. We used the Kirkpatrick model (31) to identify main outcomes variables to extract from the selected studies. This model is commonly used to evaluate the results of educational programs or training (32). Thus, data related to knowledge users' reactions after reading the infographic (*e.g., appreciation, perceived usefulness, accessibility*), learning (*e.g., knowledge, skills, attitude*) and ultimately, observed or reported changes in behaviour will be extracted.

### Q3 | What are the factors that influence infographic outcomes?

Thirdly, we believe that a number of factors will influence the relative effectiveness of infographic intervention reported in the studies (e.g., collaborative development with stakeholders, few statistics, limited numbers of colours, etc.). In this regard, this research question aims to understand how outcomes were achieved. We will extract the data related to the potential barriers or facilitators reported by the authors, if applicable. If enough data are available in the selected studies to answer this question, we will be able to propose recommendations for developing infographics based on best practices.

### Q4 | What type of research is being conducted to evaluate infographic?

Finally, we want to provide an accurate portrait of the research practices on infographics' intervention. To do this, we will extract and analyze data related to *research design used, study population and sample size, indicators and measurement tools used and types of analysis that have been performed*.

Figure 1 | Overview of research questions

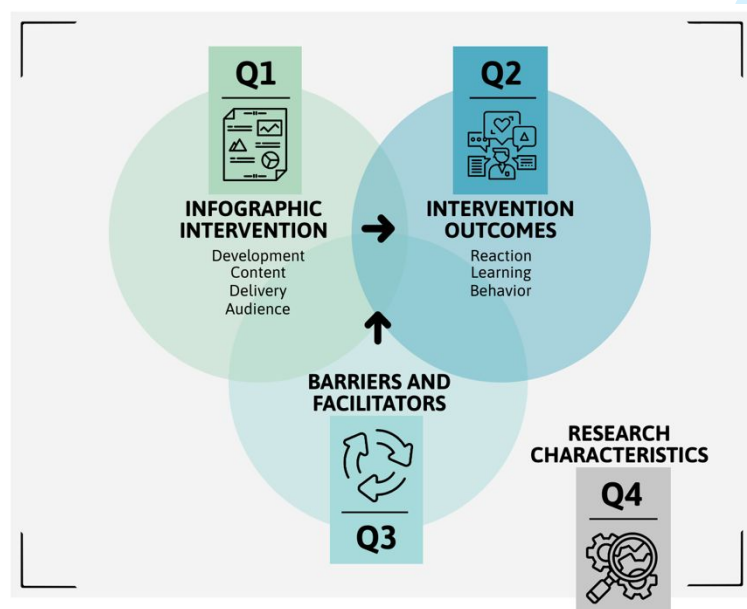

## Stage 2 | Identifying relevant studies

1  
2 205 ***Search strategy***  
3

4 206 The search strategy was developed by the first author (EMC) in collaboration with a senior  
5  
6 207 information specialist. Then, it was circulated to the research team and it was revised and  
7  
8 208 refined, as necessary. Search terms will include various keywords and related terms to (1)  
9  
10 209 Knowledge translation (e.g., research dissemination, health communication, knowledge  
11  
12 210 transfer, etc.) and (2) Infographic (e.g., information graphic, data visualization, visual abstract,  
13  
14 211 etc.) (See Appendix 1). In order to capture as many relevant articles as possible, the list of  
15  
16 212 terms will be iteratively revised after databases searching by the information specialist. The  
17  
18 213 search strategy will not be limited by study design, year of publication or publication status.  
19  
20 214 Searches will be limited to English and French language publication due to resource constraints  
21  
22 215 for translation. The search strategy for the MEDLINE database is presented in Appendix 2. It  
23  
24 216 will be adapted for the other databases and will also be available from the corresponding author,  
25  
26 217 upon request. The search strategy will be validated using the *Peer Review of Electronic Search*  
27  
28 218 *Strategies* (PRESS) Checklist (33).  
29

30 220 ***Information sources***  
31

32 221 For the purposes of the scoping review, a systematic search of the published and grey literature  
33  
34 222 will be conducted to identify relevant publications. We will search the following electronic  
35  
36 223 databases from inception onwards: MEDLINE, Cumulative Index to Nursing and Allied Health  
37  
38 224 Literature (CINAHL), PsycInfo, Social Science Abstracts, Library and Information Science  
39  
40 225 Abstracts (LISA), Education Resources Information Center (ERIC) and Cairn. All these  
41  
42 226 databases were chosen to capture the more comprehensive body of literature possible. A  
43  
44 227 search of the grey literature (e.g., reports, conference proceedings, theses, working papers,  
45  
46 228 evaluations, etc.) will be conducted using Google Scholar and Google Web search engines.  
47  
48 229 Reference lists of key articles will also be hand-searched by the review team to capture any  
49  
50 230 papers missed in the electronic searches. The search in the databases will be conducted by  
51  
52 231 our information specialist. Then, the results will be imported into *Covidence*, a review  
53  
54 232 management software, and all duplicate citations will be removed before the study selection  
55  
56 233 process.  
57

58  
59 235 **Stage 3 | Study selection**  
60 236

1  
2 237 Study selection process will consist of two stages: 1) a title and abstract screening by two  
3  
4 238 independent reviewers, and 2) a full-text screening by the two same reviewers. *Covidence* will  
5  
6 239 be used for efficiently managing all the steps of these stages. Before beginning the screening,  
7  
8 240 the eligibility criteria (inclusion and exclusion) will be pilot tested on a random sample of citations  
9  
10 241 and they will be modified if low agreement is observed between the reviewers (e.g., a kappa  
11 242 statistic less than 60%). If the agreement is acceptable, the reviewers (EMC & CC) will  
12  
13 243 independently screen the titles and abstracts of all publications retrieved to categorize whether  
14  
15 244 the piece of literature is eligible for a full review. To ensure reliability between reviewers during  
16 245 the study selection process, they will meet regularly to discuss uncertainties related to eligibility  
17  
18 246 criteria and to resolve conflicts on study selection and reach consensus. Publications identified  
19  
20 247 as potentially relevant to this scoping review will be retrieved in full text. After the completion of  
21  
22 248 the first stage and prior the full-text review, the two reviewers will meet to revise the scope of  
23 249 the review and to refine or extend inclusions and exclusion criteria, if necessary. The reviewers  
24  
25 250 will also meet regularly during the second stage to discuss and resolve conflicts. A third party  
26  
27 251 (CD or AF) will adjudicate in case of unresolved decisions for inclusion of studies at any stage.  
28  
29 252

### 30 253 ***Inclusion criteria***

31  
32 254 The inclusion criteria are based on the PCC framework (see Table 1 above). Therefore, we will  
33  
34 255 include studies that 1) empirically tested an infographic tool (i.e., which includes textual and  
35 256 visual content), 2) that disseminates research results or other health-related information and 3)  
36  
37 257 targets a non-scientific audience in order to improve knowledge use (e.g., influence attitudes,  
38  
39 258 raise awareness, improve knowledge, change practice, etc.). Other relevant articles, which do  
40  
41 259 not meet these inclusion criteria (e.g., theoretical paper on information design principles, visual  
42 260 literacy, etc.), will be held in a separate folder and will be used to support results' analysis and  
43  
44 261 interpretation, if needed.  
45  
46 262

### 47 263 ***Exclusion criteria***

48  
49 264 We will exclude the following:

- 50  
51 265 → Studies that do not focus on health-related issues
- 52  
53 266 → Studies that target children like primary school students
- 54  
55 267 → Studies that concern one type of graph or charts (e.g., bar charts, forest plots, 3D graphs,  
56 268 etc.)  
57  
58  
59  
60

- 1  
2 269 → Studies that only address interactive data visualization tools (e.g., video, apps, websites,  
3 etc.)  
4 270  
5  
6 271 → Studies that use individual health data (e.g., personal data contained in electronic health  
7 records)  
8 272  
9 273 → Studies that use infographics as a form of therapy or clinical intervention  
10  
11 274 → Studies that focus on developing skills to visualize data  
12  
13 275 → Studies that do not make the evaluated infographic tool available  
14  
15 276 → Studies published in other languages than French and English  
16  
17 277

#### 18 278 **Stage 4 | Charting the data**

19  
20  
21 279 A data extraction form will be developed using Microsoft Excel. It will be piloted tested  
22 by the two same reviewers on a random sample of 10% of the included articles. They will then  
23 280 meet with the research team to discuss uncertainties and additional potentially relevant  
24 281 information to include in the data extraction form. The remaining 90% of studies will be  
25 282 abstracted by one team member (EMC), and verified by a second reviewer (CC & AF). The  
26 283 data extraction form will therefore be iteratively revised if necessary, to ensure its rigour and  
27 284 ability to capture all relevant data to answer the review questions. Table 2 presents the data  
28 285 that will be extracted from all included studies.  
29  
30  
31  
32  
33 286  
34  
35

36 **Table 2 | Preliminary data extraction form**

|    |                                                        |                                                                                                                                                                                                                                                                                                           |
|----|--------------------------------------------------------|-----------------------------------------------------------------------------------------------------------------------------------------------------------------------------------------------------------------------------------------------------------------------------------------------------------|
|    | <b><i>General information of selected studies</i></b>  | <ul style="list-style-type: none"> <li>- Study title</li> <li>- Author(s)</li> <li>- Year of publication</li> <li>- Country of origin</li> <li>- Topic of the infographic</li> <li>- Terms and concept definition</li> </ul>                                                                              |
| Q1 | <b><i>Infographic intervention characteristics</i></b> | <ul style="list-style-type: none"> <li>- Content and visual aspects of the infographic (<i>e.g., coherence, colours, alignment, visual hierarchy, charts used, imagery, heading highlight</i>)</li> <li>- Target audience characteristics (e.g., elderly persons, teenagers, physicians, etc.)</li> </ul> |

|           |                                         |                                                                                                                                                                                                                                                                                                                                                                                                                 |
|-----------|-----------------------------------------|-----------------------------------------------------------------------------------------------------------------------------------------------------------------------------------------------------------------------------------------------------------------------------------------------------------------------------------------------------------------------------------------------------------------|
|           |                                         | <ul style="list-style-type: none"> <li>- Delivery method and context (<i>e.g., online versus printed infographic, targeted mail or social media, infographic used alone versus in addition to other activities</i>).</li> <li>- Development process (<i>e.g., expertise and resources, in collaboration with relevant stakeholders, pilot testing, etc.</i>)</li> </ul>                                         |
| <b>Q2</b> | <b><i>Outcomes characteristics</i></b>  | <ul style="list-style-type: none"> <li>- Audience's reactions to infographic (<i>e.g., appreciation/reading experience, perceived usefulness/relevance, accessibility/user-friendliness</i>)</li> <li>- Audience's learning (<i>improved knowledge and skills, attitude change</i>)</li> <li>- Audience's behaviour change (<i>e.g., application of learning in practice, decision-making, etc.</i>)</li> </ul> |
| <b>Q3</b> | <b><i>Barriers and facilitators</i></b> | <ul style="list-style-type: none"> <li>- Factors that influenced infographic outcomes</li> <li>- Recommendations or lessons learned related to infographic design or conception, diffusion or sharing practices</li> </ul>                                                                                                                                                                                      |
| <b>Q4</b> | <b><i>Research characteristics</i></b>  | <ul style="list-style-type: none"> <li>- Study purpose</li> <li>- Methods and research design</li> <li>- Population and sample size</li> <li>- Indicators and measurement tools</li> <li>- Types of data analysis</li> </ul>                                                                                                                                                                                    |

Because the aim of a scoping review is to identify gaps in the evidence base, we will not appraise the methodological quality or risk of bias of the included articles, which is consistent with guidance on scoping review conduct (23–25).

## Stage 5 | Collating, summarizing and reporting the results

The synthesis stage of this review will involve a descriptive summary and thematic analysis of the extracted data (24). To ensure rigour, the analysis will be conducted by two reviewers with



1  
2 295 input from collaborators during the process. A descriptive summary of the characteristics of the  
3  
4 296 selected publications (year of publication, country of origin, topics of interest or domain, study  
5  
6 297 design, etc.) will be presented using frequencies and percentages. We will also prepare a  
7  
8 298 descriptive summary table of all data extracted from included studies that are aligned with our  
9  
10 299 research questions (based on variables of Q1-Q2-Q4 presented in Table 2). This table will map  
11 300 key findings regarding the measured effectiveness outcomes in each study, the characteristics  
12  
13 301 of the infographic intervention process, and the characteristics of research designs used. A  
14  
15 302 qualitative descriptive summary will accompany the tabulated results in order to describe how  
16 303 the results relate to our research questions (Q1, Q2 & Q4). Finally, if the extracted data allows  
17  
18 304 it, we will perform a more in-depth qualitative analysis to understand which potential factors  
19  
20 305 influence the outcomes reported in the studies (Q3) (e.g., infographics developed in  
21  
22 306 collaboration with stakeholders or which contain few statistics appear to be more effective).  
23 307 Thus, data related to outcomes results will be discussed in light of the characteristics of the  
24  
25 308 infographics intervention process, in order to understand what can influence their effectiveness.  
26  
27 309 The PRISMA extension designed for scoping reviews will be used to guide the final reporting  
28  
29 310 of the results of this scoping review.  
30

## 31 311 **Stage 6 | Consulting with relevant stakeholders**

32

33 312  
34  
35 313 Even if it represents an optional stage, consultation can be a relevant and useful component to  
36  
37 314 include in a scoping review process because it adds methodological rigour and enhance the  
38  
39 315 validity and usefulness of the review results (24,34). Since all authors of this protocol are  
40 316 members of a transdisciplinary research team on knowledge translation in Canada (RENARD  
41  
42 317 team), we will mobilize our network. We will develop a consultation panel that includes KT  
43  
44 318 researchers and practitioners, representatives from KB organizations and graduated students.  
45 319 All RENARD members are familiar with the KT research field and/or with developing and  
46  
47 320 implementing KT activities to improve knowledge uptake. The input from these informants on  
48  
49 321 our findings will be essential to 1) provide us additional references to include in the review as  
50  
51 322 well as 2) add valuable insights on our preliminary results, and 3) develop, contextualize and  
52 323 validate recommendations based on the scoping review's results (e.g., research priorities or  
53  
54 324 criteria for developing effective infographics). The consultation exercise will consist of two focus  
55  
56  
57  
58  
59

1  
2 325 groups (one with preliminary results and one at the final stage) with approximately 10  
3  
4 326 stakeholders per group.  
5

## 6 327 7 8 328 **ETHICS AND DISSEMINATION**

---

9 329  
10  
11 330 To our knowledge, this will be the first comprehensive scoping review on the use and  
12  
13 331 effectiveness of infographics as a KT intervention to improve knowledge uptake (e.g., raise  
14  
15 332 awareness, influence attitudes, increase knowledge, inform practice, change behaviour, etc.)  
16  
17 333 in health-related field. This review will contribute both to the KT science and practice. In  
18  
19 334 summary, we will identify where gaps exist in the literature, as well as the research area(s)  
20  
21 335 which require a systematic review or primary research. This scoping review will be helpful to  
22  
23 336 improve not only the research carried out in this field (e.g., recommendations for study designs,  
24  
25 337 indicators and measurement tools, etc.) but may also give support for the development of  
26  
27 338 infographic for KT in the future. In this regard, we will be able to describe what an infographic  
28  
29 339 is and what form this tool can take (offering a common terminology and definition in the KT  
30  
31 340 field), to identify in which context infographic can be effective and finally (if possible) to identify  
32  
33 341 key principles to consider for producing an effective infographic in order to improve knowledge  
34  
35 342 uptake.

36  
37 343 Ethics approval was exempt for the present study because no data collection was required. The  
38  
39 344 search strategy and data extraction process are planned to be completed by January 2021 and  
40  
41 345 the results will be ready by June 2021. We will ensure broad dissemination of our scoping  
42  
43 346 review findings through multiple activities: publication in an open-access peer-reviewed  
44  
45 347 international journal, presentation in a relevant KT conference (e.g., *Canadian Knowledge*  
46  
47 348 *Mobilization Forum*) and preparation of user-friendly KT tool such as webinar, plain language  
48  
49 349 summary and infographic which will be disseminated on our research team's website,  
50  
51 350 newsletter and social media ([www.equiperenard.org](http://www.equiperenard.org)).  
52

53 351  
54  
55 352 **Acknowledgements** We want to thank Julie Desnoyers, the information specialist affiliated to  
56  
57 353 the RENARD research team on knowledge translation at Universite of Montreal, for assisting  
58  
59 354 with adapting the search strategy used in this scoping review.  
60



1  
2 355  
3  
4 356 **Contributors** EMC, CC, AF and CD conceptualized the study. EMC drafted the protocol. CC,  
5  
6 357 AF and CD critically revised the manuscript. EMC wrote the final draft manuscript and all the  
7  
8 358 authors approved it.

9 359  
10  
11 360 **Funding** The authors have not declared a specific grant for this research from any funding  
12  
13 361 agency in the public, commercial or not-for-profit sectors.

14 362  
15  
16 363 **Competing interests** None declared.

17  
18 364  
19  
20 365 **Patient and public involvement** Patients and/or the public were not involved in the design, or  
21  
22 366 conduct, or reporting, or dissemination plans of this research.

23 367  
24  
25 368 **Patient consent for publication** Not required.

26  
27 369  
28  
29 370 **Provenance and peer review** Not commissioned; externally peer reviewed.

30 371  
31  
32 372 **Word Count** 3450 words (excluding abstract, references and appendices)

33 373

35

36 374

38

39 375

40

41

42 376

43

44 377

45

46 378

47

48 379

49

50 380

51

52 381

53

54 382

55

56

57

58

59

60

## REFERENCES

---

1. Graham ID, Logan J, Harrison MB, Straus SE, Tetroe J, Caswell W, et al. Lost in knowledge translation: time for a map? *J Contin Educ Health Prof.* 2006;26(1):13-24.
2. McKibbin KA, Lokker C, Wilczynski NL, Ciliska D, Dobbins M, Davis DA, et al. A cross-sectional study of the number and frequency of terms used to refer to knowledge translation in a body of health literature in 2006: a Tower of Babel? *Implementation Science.* 12 févr 2010;5(1):16.

1  
2  
3  
4  
5  
6  
7  
8  
9  
10  
11  
12  
13  
14  
15  
16  
17  
18  
19  
20  
21  
22  
23  
24  
25  
26  
27  
28  
29  
30  
31  
32  
33  
34  
35  
36  
37  
38  
39  
40  
41  
42  
43  
44  
45  
46  
47  
48  
49  
50  
51  
52  
53  
54  
55  
56  
57  
58  
59  
60

- 383 3. Straus S, Tetroe J, Graham ID. Knowledge Translation in Health Care: Moving from  
384 Evidence to Practice. John Wiley & Sons; 2013. 359 p.
- 385 4. Instituts de recherche en santé du Canada (IRSC). Application des connaissances  
386 [Internet]. 2017. Disponible à: <http://www.cihr-irsc.gc.ca/f/29529.html>
- 387 5. Langer L, Tripney J, Gough D. The science of using science: Researching the use of  
388 research evidence in decision-making [Internet]. London: EPPI-Centre, Social Science  
389 Research Unit, UCL Institute of Education, University College London; 2016.
- 390 6. Graham ID, Tetroe JM. Getting Evidence into Policy and Practice: Perspective of a Health  
391 Research Funder. *J Can Acad Child Adolesc Psychiatry*. févr 2009;18(1):46-50.
- 392 7. Graham ID, Tetroe J, Gagnon M. Knowledge dissemination: End of grant knowledge  
393 translation. Dans: MSc SESM FRCPC, Tetroe J, FCAHS IDG, éditeurs. Knowledge  
394 Translation in Health Care [Internet]. John Wiley & Sons, Ltd; 2013; p. 75-92.
- 395 8. Lemire N, Souffez K, Laurendeau M-C. Facilitating a knowledge translation process:  
396 Knowledge review and facilitation tool. Direction de la recherche, formation et  
397 développement, Institut national de santé publique Québec; 2013.
- 398 9. Lafreniere D, Menuz V, Hurlimann T, Godard B. Knowledge Dissemination Interventions:  
399 A Literature Review. *SAGE Open* [Internet]. 1 août 2013 [cité 2 sept 2013];3(3). Disponible  
400 à: <http://sgo.sagepub.com/lookup/doi/10.1177/2158244013498242>
- 401 10. Bennett G, Jessani N, éditeurs. The Knowledge Translation Toolkit - Bridging the Know-  
402 Do Gap: A Resource for Researchers. Ottawa: SAGE Publications and International  
403 Development Research Centre; 2011.
- 404 11. Walter I, Nutley S, Davies H. What works to promote evidence-based practice? A cross-  
405 sector review. *Evidence & Policy: A Journal of Research, Debate and Practice*.  
406 2005;1(3):335-64.
- 407 12. Stones C, Gent M. 7 G.R.A.P.H.I.C Principles of Public Health Infographic Design. Leeds:  
408 University of Leeds, Public Health England; 2015.

- 1  
2 409 13. Balkac M, Ergun E. Role of Infographics in Healthcare. *Chin Med J (Engl)*. 20 oct  
3 410 2018;131(20):2514-7.  
4  
5  
6  
7 411 14. Scott H, Fawkner S, Oliver C, Murray A. Why healthcare professionals should know a little  
8 412 about infographics. *Br J Sports Med*. 1 sept 2016;50(18):1104-5.  
9  
10  
11 413 15. Murray IR, Murray AD, Wordie SJ, Oliver CW, Murray AW, Simpson AHRW. Maximising  
12 414 the impact of your work using infographics. *Bone Joint Res*. nov 2017;6(11):619-20.  
13  
14  
15  
16 415 16. Smiciklas M. *The Power of Infographics: Using Pictures to Communicate and Connect*  
17 416 *With Your Audiences*. 1st Edition. Indianapolis, Ind: Que Publishing; 2012. 224 p.  
18  
19  
20 417 17. Martin LJ, Turnquist A, Groot B, Huang SYM, Kok E, Thoma B, et al. Exploring the Role of  
21 418 Infographics for Summarizing Medical Literature. *Health Professions Education*. 1 mars  
22 419 2019;5(1):48-57.  
23  
24  
25  
26 420 18. Darcy, R. Infographics, assessment and digital literacy: innovating learning and teaching  
27 421 through developing ethically responsible digital competencies in public  
28 422 health. *Personalised Learning. Diverse Goals. One Heart*. 2019, 112.  
29  
30  
31  
32  
33 423 19. Houts PS, Doak CC, Doak LG, Loscalzo MJ. The role of pictures in improving health  
34 424 communication: A review of research on attention, comprehension, recall, and adherence.  
35 425 *Patient Education and Counseling*. mai 2006;61(2):173–190.  
36  
37  
38  
39 426 20. Buljan I, Malički M, Wager E, Puljak L, Hren D, Kellie F, et al. No difference in knowledge  
40 427 obtained from infographic or plain language summary of a Cochrane systematic review:  
41 428 three randomized controlled trials. *Journal of Clinical Epidemiology*. 1 mai 2018;97:86-94.  
42  
43  
44  
45 429 21. Crick K, Hartling L. Preferences of Knowledge Users for Two Formats of Summarizing  
46 430 Results from Systematic Reviews: Infographics and Critical Appraisals. *PLoS One*  
47 431 [Internet]. 14 oct 2015 [cité 2 avr 2020];10(10). Disponible à:  
48 432 <https://www.ncbi.nlm.nih.gov/pmc/articles/PMC4605679/>  
49  
50  
51  
52  
53 433 22. Occa A, Suggs LS. Communicating Breast Cancer Screening With Young Women: An  
54 434 Experimental Test of Didactic and Narrative Messages Using Video and Infographics.  
55 435 *Journal of Health Communication*. 2 janv 2016;21(1):1-11.  
56  
57  
58  
59  
60

- 1  
2 436 23. Arksey H, O'Malley L. Scoping studies: towards a methodological framework. *International*  
3  
4 437 *Journal of Social Research Methodology*. 1 févr 2005;8(1):19-32.  
5  
6  
7 438 24. Levac D, Colquhoun H, O'Brien KK. Scoping studies: advancing the methodology.  
8  
9 439 *Implementation Sci*. 20 sept 2010;5(1):69.  
10  
11 440 25. Peters M, Godfrey C, McInerney P, Munn Z, Trico A, Khalil H. Chapter 11: Scoping  
12  
13 441 Reviews. Dans: Aromataris E, Munn Z, éditeurs. *JBI Manual for Evidence Synthesis*  
14  
15 442 [Internet]. JBI; 2020 [cité 24 sept 2020]. Disponible à:  
16  
17 443 <https://wiki.jbi.global/display/MANUAL/Chapter+11%3A+Scoping+reviews>  
18  
19 444 26. Munn Z, Peters MDJ, Stern C, Tufanaru C, McArthur A, Aromataris E. Systematic review  
20  
21 445 or scoping review? Guidance for authors when choosing between a systematic or scoping  
22  
23 446 review approach. *BMC Med Res Methodol*. 19 nov 2018;18(1):143.  
24  
25 447 27. Jeremy Grimshaw. *A Guide to Knowledge Synthesis - CIHR* [Internet]. Canadian Institutes  
26  
27 448 of Health Research. 2010 [cité 28 janv 2015]. Disponible à: [http://www.cihr-](http://www.cihr-irsc.gc.ca/e/41382.html)  
28  
29 449 [irsc.gc.ca/e/41382.html](http://www.cihr-irsc.gc.ca/e/41382.html)  
30  
31  
32 450 28. Tricco AC, Lillie E, Zarin W, O'Brien KK, Colquhoun H, Levac D, et al. PRISMA Extension  
33  
34 451 for Scoping Reviews (PRISMA-ScR): Checklist and Explanation. *Annals of Internal*  
35  
36 452 *Medicine*. 4 sept 2018;169(7):467-73.  
37  
38 453 29. Hall A, Furlong B, Pike A, Logan G, Lawrence R, Ryan A, et al. Using theatre as an arts-  
39  
40 454 based knowledge translation strategy for health-related information: a scoping review  
41  
42 455 protocol. *BMJ Open*. 1 oct 2019;9(10):e032738.  
43  
44 456 30. Barac R, Stein S, Bruce B, Barwick M. Scoping review of toolkits as a knowledge  
45  
46 457 translation strategy in health. *BMC Medical Informatics and Decision Making*. 24 déc  
47  
48 458 2014;14(1):121.  
49  
50 459 31. Kirkpatrick JD, Kirkpatrick WK. *Kirkpatrick's Four Levels of Training Evaluation*.  
51  
52 460 Association for Talent Development; 2016. 341 p.  
53  
54  
55 461 32. Smidt A, Balandin S, Sigafos J, Reed VA. The Kirkpatrick model: A useful tool for  
56  
57 462 evaluating training outcomes. *J Intellect Dev Disabil*. 2009;34(3):266-74.  
58  
59  
60

1  
2  
3  
4  
5  
6  
7  
8  
9  
10  
11  
12  
13  
14  
15  
16  
17  
18  
19  
20  
21  
22  
23  
24  
25  
26  
27  
28  
29  
30  
31  
32  
33  
34  
35  
36  
37  
38  
39  
40  
41  
42  
43  
44  
45  
46  
47  
48  
49  
50  
51  
52  
53  
54  
55  
56  
57  
58  
59  
60

463 33. McGowan J, Sampson M, Salzwedel DM, Cogo E, Foerster V, Lefebvre C. PRESS Peer  
464 Review of Electronic Search Strategies: 2015 Guideline Statement. Journal of Clinical  
465 Epidemiology. 1 juill 2016;75:40-6.

466 34. Tricco AC, Lillie E, Zarin W, O'Brien K, Colquhoun H, Kastner M, et al. A scoping review  
467 on the conduct and reporting of scoping reviews. BMC Med Res Methodol. 9 févr  
468 2016;16(1):15.

For peer review only

## Appendix 1| List of terms for the search strategy

| TOOL<br>Terms related to <i>Infographic</i> | PURPOSE<br>Terms related to <i>Knowledge translation</i> |
|---------------------------------------------|----------------------------------------------------------|
| Infographic*                                | Health communicat*                                       |
| Data visuali?ation                          | Information translation                                  |
| Information graphic*                        | Knowledge translation                                    |
| Visual abstract*                            | Knowledge transfer                                       |
| Visual display                              | Health promotion                                         |
| Visual graphic*                             | Health literacy                                          |
| Visual presentation*                        | Health education                                         |
| Visual stor*                                | Science communicat*                                      |
| Datagraphic*                                | Scientific presentation*                                 |
| Graphic presentation*                       | Research disseminat*                                     |
| Visual* data                                | Research translation                                     |
| Information visuali?ation*                  | Research transfer                                        |
| Graphic* data                               | Information disseminat*                                  |
| Info-graphic*                               | Information communicat*                                  |
|                                             | Research communicat*                                     |
|                                             | Knowledge mobili?ation                                   |
|                                             | Knowledge exchange                                       |
|                                             | Knowledge broker*                                        |
|                                             | Knowledge utili?ation                                    |
|                                             | Knowledge use                                            |
|                                             | Research impact*                                         |
|                                             | Research utili?ation                                     |
|                                             | Evidence use                                             |
|                                             | Evidence-based                                           |
|                                             | Research literature                                      |
|                                             | Medical research                                         |
|                                             | Research evidence                                        |

|  |                         |
|--|-------------------------|
|  | Research data           |
|  | Scientific knowledge    |
|  | Health information*     |
|  | Research result*        |
|  | Systematic review*      |
|  | Medical literature      |
|  | Information retention   |
|  | Information acquisition |

## Appendix 2 | Search strategy

---

**Date :** July 21<sup>st</sup> 2020

**Database :** MEDLINE

**Keywords (title and abstract) :**

((research adj2 literature).ab,ti. OR (medical adj2 research).ab,ti. OR (research adj2 evidence).ab,ti. OR (research adj2 data).ab,ti. OR (scientific adj2 knowledge).ab,ti. OR (health adj2 information\*).ab,ti. OR (research adj2 result\*).ab,ti. OR (systematic adj2 review\*).ab,ti. OR (medical adj2 literature).ab,ti. OR (information adj2 retention).ab,ti. OR (information adj2 translation).ab,ti. OR (knowledge adj2 translation).ab,ti. OR (knowledge adj2 transfer).ab,ti. OR (health adj2 promotion).ab,ti. OR (health adj2 literacy).ab,ti. OR (health adj2 education).ab,ti. OR (science adj2 communicat\*).ab,ti. OR (scientific adj2 presentation\*).ab,ti. OR (research adj2 disseminat\*).ab,ti. OR (research adj2 translation).ab,ti. OR evidence-based.ab,ti. OR (evidence adj2 "use").ab,ti. OR (knowledge adj2

1  
2 mobili?ation).ab,ti. OR (knowledge adj2 exchange).ab,ti. OR (knowledge adj2 broker\*).ab,ti.  
3  
4 OR (knowledge adj2 utili?ation).ab,ti. OR (knowledge adj2 "use").ab,ti. OR (research adj2  
5  
6 impact\*).ab,ti. OR (research adj2 utili?ation).ab,ti. OR (research adj2 transfer).ab,ti. OR  
7  
8 (information adj2 disseminat\*).ab,ti. OR (information adj2 communicat\*).ab,ti. OR (research  
9  
10 adj2 communicat\*).ab,ti. OR (information adj2 acquisition).ab,ti. OR Health Communication/  
11  
12 OR Information Dissemination/ OR Health Promotion/)  
13  
14 AND ("infographic\*".ab,ti. OR (data adj2 visuali?ation).ab,ti. OR (information adj2  
15  
16 graphic\*).ab,ti. OR (visual adj2 abstract\*).ab,ti. OR "datagraphic\*".ab,ti. OR (visual adj2  
17  
18 display).ab,ti. OR (visual adj2 graphic\*).ab,ti. (visual adj2 presentation\*).ab,ti. OR (visual adj2  
19  
20 stor\*).ab,ti. OR (graphic adj2 presentation\*).ab,ti. OR (information adj2 visuali?ation\*).ab,ti.  
21  
22 OR (visual\* adj2 data).ab,ti. OR (graphic\* adj2 data).ab,ti. OR "info-graphic\*".ab,ti. OR data  
23  
24 visualization/)  
25

26  
27  
28 **Search results: 623**  
29  
30  
31  
32  
33  
34  
35  
36  
37  
38  
39  
40  
41  
42  
43  
44  
45  
46  
47  
48  
49  
50  
51  
52  
53  
54  
55  
56  
57  
58  
59  
60



# BMJ Open

## The use of infographics as a health-related knowledge translation tool: protocol for a scoping review

|                                 |                                                                                                                                                                                                                                                                                                                                                          |
|---------------------------------|----------------------------------------------------------------------------------------------------------------------------------------------------------------------------------------------------------------------------------------------------------------------------------------------------------------------------------------------------------|
| Journal:                        | <i>BMJ Open</i>                                                                                                                                                                                                                                                                                                                                          |
| Manuscript ID                   | bmjopen-2020-046117.R1                                                                                                                                                                                                                                                                                                                                   |
| Article Type:                   | Protocol                                                                                                                                                                                                                                                                                                                                                 |
| Date Submitted by the Author:   | 26-Jan-2021                                                                                                                                                                                                                                                                                                                                              |
| Complete List of Authors:       | Mc Sween-Cadieux, Esther; University of Montreal, Psychology<br>Chabot, Catherine; University of Montreal, Psychology<br>Fillol, Amandine; University of Montreal, School of Public Health; Institut de recherche pour le développement, CEPED - IRD-Université de Paris - ERL INSERM SAGESUD<br>Dagenais, Christian; University of Montreal, Psychology |
| <b>Primary Subject Heading</b>: | Public health                                                                                                                                                                                                                                                                                                                                            |
| Secondary Subject Heading:      | Medical education and training, Evidence based practice, Communication                                                                                                                                                                                                                                                                                   |
| Keywords:                       | SOCIAL MEDICINE, PUBLIC HEALTH, MEDICAL EDUCATION & TRAINING                                                                                                                                                                                                                                                                                             |
|                                 |                                                                                                                                                                                                                                                                                                                                                          |

SCHOLARONE™  
Manuscripts



I, the Submitting Author has the right to grant and does grant on behalf of all authors of the Work (as defined in the below author licence), an exclusive licence and/or a non-exclusive licence for contributions from authors who are: i) UK Crown employees; ii) where BMJ has agreed a CC-BY licence shall apply, and/or iii) in accordance with the terms applicable for US Federal Government officers or employees acting as part of their official duties; on a worldwide, perpetual, irrevocable, royalty-free basis to BMJ Publishing Group Ltd ("BMJ") its licensees and where the relevant Journal is co-owned by BMJ to the co-owners of the Journal, to publish the Work in this journal and any other BMJ products and to exploit all rights, as set out in our [licence](#).

The Submitting Author accepts and understands that any supply made under these terms is made by BMJ to the Submitting Author unless you are acting as an employee on behalf of your employer or a postgraduate student of an affiliated institution which is paying any applicable article publishing charge ("APC") for Open Access articles. Where the Submitting Author wishes to make the Work available on an Open Access basis (and intends to pay the relevant APC), the terms of reuse of such Open Access shall be governed by a Creative Commons licence – details of these licences and which [Creative Commons](#) licence will apply to this Work are set out in our licence referred to above.

Other than as permitted in any relevant BMJ Author's Self Archiving Policies, I confirm this Work has not been accepted for publication elsewhere, is not being considered for publication elsewhere and does not duplicate material already published. I confirm all authors consent to publication of this Work and authorise the granting of this licence.

1  
2  
3  
4  
5  
6  
7  
8 **The use of infographics as a health-related knowledge translation tool: protocol for a scoping**  
9 **review**  
10

11  
12  
13 *Esther Mc Sween-Cadieux*<sup>1</sup>  
14

15  
16 *Catherine Chabot*<sup>1</sup>,  
17

18  
19 *Amandine Fillo*<sup>2,3</sup>  
20

21  
22  
23 *Christian Dagenais*<sup>1</sup>  
24  
25  
26  
27  
28  
29

30 **Author affiliations**  
31

---

32  
33  
34 <sup>1</sup> Department of Psychology, University of Montreal, Montreal, Quebec, Canada  
35

36  
37 <sup>2</sup> School of Public Health, University of Montreal, Montreal, Quebec, Canada.  
38

39  
40  
41 <sup>3</sup> CEPED, Institute for Research on Sustainable Development, IRD-Université de Paris, ERL  
42 INSERM SAGESUD, Paris, France  
43  
44  
45  
46

47 **Corresponding author**  
48

---

49  
50  
51 Esther Mc Sween-Cadieux, Ph.D

52 esther.mcsween-cadieux@umontreal.ca

53  
54 ORCID iD - <https://orcid.org/0000-0001-5403-0035>  
55  
56  
57  
58  
59  
60

1  
2  
3  
4  
5  
6  
7  
8  
9  
10  
11  
12  
13  
14  
15  
16  
17  
18  
19  
20  
21  
22  
23  
24  
25  
26  
27  
28  
29  
30  
31  
32  
33  
34  
35  
36  
37  
38  
39  
40  
41  
42  
43  
44  
45  
46  
47  
48  
49  
50  
51  
52  
53  
54  
55  
56  
57  
58  
59  
60

For peer review only

## ABSTRACT

---

**Introduction.** Efforts to bridge the *know-do gap* have paved the way for the development of the knowledge translation field (KT). KT aims to understand how to promote and effectively support the use of evidence through different activities and strategies. As a dissemination activity, infographics are gaining more and more ground as a promising KT tool to reach multiple health research users (e.g., health practitioners, patients and families, decision makers). However, to our knowledge, no study has been conducted to map and synthesize the available data on this KT tool. Therefore, this scoping review will explore the depth and breadth of evidence about the use and effectiveness of infographics to improve health research uptake (e.g., raise awareness, influence attitudes, increase knowledge, inform practice, change behaviour).

**Methods and analysis.** We will use the scoping review methodological framework first proposed by Arksey and O'Malley (2005), improved by Levac and colleagues (2010) and further refined by the Joanna Briggs Institute (2020). The search strategy will be conducted in MEDLINE, CINAHL, PsycInfo, Social Science Abstracts, LISA, ERIC, Cairn and Google Scholar. We will also search for relevant literature from the reference list of the included articles. Study selection will be conducted by two independent reviewers. Any types of studies will be eligible for inclusion, and we will not have any date, or publication status restrictions. The included studies will have evaluated an infographic that disseminates health research and targets a non-scientific audience. A data extraction form will be standardized and used to extract and chart the data. Afterward, the data will be synthesized to present a descriptive summary of the results.

**Ethics and dissemination.** Ethics approval is not required. Our dissemination plan includes publication in an open-access peer-reviewed journal, presentation in a KT conference and preparation of user-friendly KT tools distributed via social media (webinar, plain language summary and infographic).

## KEYWORDS

---

1  
2  
3  
4  
5  
6  
7  
8  
9  
10  
11  
12  
13  
14  
15  
16  
17  
18  
19  
20  
21  
22  
23  
24  
25  
26  
27  
28  
29  
30  
31  
32  
33  
34  
35  
36  
37  
38  
39  
40  
41  
42  
43  
44  
45  
46  
47  
48  
49  
50  
51  
52  
53  
54  
55  
56  
57  
58  
59  
60

Infographic, effectiveness, knowledge translation, knowledge uptake, scoping review, health research.

For peer review only

## STRENGTHS AND LIMITATIONS OF THIS STUDY

---

→ This scoping review is the first known to uncover and synthesize literature related to the use and effectiveness of infographics to improve knowledge uptake in health.

→ This protocol adheres to Levac et al.'s methodological guidelines built on Arksey and O'Malley's original framework and the guidelines from the Joanna Briggs Institute.

→ This review will include multiple reviewers for all phases of study selection and data extraction.

→ A limitation of this study is that only literature in English and French will be included, which will limit the scope of this review.

→ Following accepted scoping review guidelines, the review will not formally assess the quality of included studies, limiting our ability to assess the strength of existing evidence.

## BACKGROUND

---

### Knowledge translation

Efforts to mobilize the phenomenal amount of research results and evidence-based information have paved the way for the development of the knowledge translation field (KT) (1–3). According to the *Canadian Institutes of Health Research*, KT is defined as “*a dynamic and iterative process that includes synthesis, dissemination, exchange and ethically-sound application of knowledge*” to improve health, health services delivery and the healthcare system (4). KT science aims to understand how to promote and effectively support the use of evidence through different KT activities and strategies (5). The choice of activities will vary according to the KT objective (e.g., raising awareness, improving action through a change in practice among professionals, influence political decision-making, mobilize public action), the knowledge users’ needs, the implementation context and the nature and type of knowledge to be shared (6).

In this study, our focus of interest will be on dissemination activities—also known as end-of grant KT in Canada, which requires expertise in communication and vulgarization (1,7,8). The primary goal of dissemination activities is to “*make new knowledge understandable and accessible so as to effectively reach the groups of actors concerned*” (p.30) (8). Studies show that the passive dissemination of documents poorly suited to the preferences and characteristics of the target audience is often ineffective (5,8,9). For this purpose, KT field emphasizes the importance to develop dissemination tools that are attractive and adapted to users’ preferences (5). For example, dissemination activities may be a summary sheet or infographic, a practice guide, a newsletter, brochures and leaflets, policy briefs, cartoons and videos, books, reports and plain-language articles, etc. (8,10,11). Due to the knowledge translation movement, research dissemination is no longer limited to peer-reviewed publications and scientific conferences and now, more and more innovative and promising tools are used for knowledge sharing. This project will specifically focus on one of these tools, namely infographics (12–14).

### Infographics for knowledge translation



1  
2  
3  
4  
5  
6  
7  
8  
9  
10  
11  
12  
13  
14  
15  
16  
17  
18  
19  
20  
21  
22  
23  
24  
25  
26  
27  
28  
29  
30  
31  
32  
33  
34  
35  
36  
37  
38  
39  
40  
41  
42  
43  
44  
45  
46  
47  
48  
49  
50  
51  
52  
53  
54  
55  
56  
57  
58  
59  
60

Infographics, an abbreviated term for *information graphic*—are increasingly popular in the digital age in which we live. While no single definition of the term infographics has gained wide acceptance, infographic is often understood as an eye-catching one-page document that uses striking and engaging visuals to communicate complex evidence-based information in an attractive and easily understandable way (15–17). In other words, an infographic “*provides a concise overview of a topic through visually representing information or data using graphics, icons and/or images, with minimal words*” (p.112) (18). An infographic also usually presents information in a logical manner to tell a story (13,14).

Infographics are now everywhere and are used by many different industries: business, environment, food, finance, politics and the healthcare sector (14). When infographics are used for health communication purposes, it is expected that they capture users' attention, help them better understand the information presented, increase their ability to retain and recall the message and encourage users to act in accordance with the information (19). Infographics are thus gaining more and more ground as a promising research or health information dissemination tool to reach multiple potential knowledge users such as health practitioners, patients and families, decision makers or community members. Several initiatives from the research community aim to produce and distribute infographics in scientific journals or on social media (e.g., Twitter, Facebook, LinkedIn, Pinterest, Instagram). Moreover, because of the recent emergence of easy-to-use software for producing infographics, it appears that they are now used as a go-to tool in different contexts, targeting different audiences, and using different formats and designs. Thus, it is important to conduct studies on infographics to better understand their real effectiveness to improve knowledge uptake and to highlight best practices to design, produced and shared them. In this regard, more and more empirical studies are carried out to evaluate infographics as an intervention for disseminating research results or evidence-based information (17,20–22).

## Purpose

To our knowledge, no study has been carried out to map the available evidence about this tool. Thereby, our overarching goal is to explore the depth and breadth of evidence about the use and effectiveness of infographics as a KT intervention to improve knowledge uptake

(e.g., raise awareness, influence attitudes, increase knowledge, inform practice, change behaviour) in health. In order to achieve this, we will conduct a scoping review as an evidence synthesis approach (23–25). This approach is recommended when the purpose is, for example, to clarify key concepts and definitions in the literature, to identify key characteristic or factors related to a concept or to examine how research is conducted on a certain topic (26). According to the Canadian Institutes of Health Research, a scoping review is “*undertaken when feasibility is a concern—either because the potentially relevant literature is thought to be especially vast and diverse (varying by method, theoretical orientation or discipline) or there is a suspicion that not enough literature exists.*” (p.34) (27). Therefore, a scoping review is particularly useful to identify knowledge gaps to inform future research priorities.

## METHODS AND ANALYSIS

---

To guide the scoping review methodology, we will primarily use the scoping review methodological framework first proposed by Arksey and O’Malley (2005) (23), improved by Levac, Colquhoun and O’Brien (2010) (24) and further refined by the Joanna Briggs Institute (2020) (25). A scoping review includes six key phases: (i) identifying the research questions; (ii) identifying relevant studies; (iii) selecting studies; (iv) charting the data; (v) collating, summarizing and reporting the results and (vi) consulting with relevant stakeholders. This protocol is congruent with the PRISMA-ScR checklist (*Preferred Reporting Items for Systematic Reviews and Meta-Analyses: Extension for scoping reviews*), as will be the reporting of the scoping review (28). This scoping review protocol is inspired and based on previous scoping reviews on similar KT activities and tools (29,30).

### Stage 1 | Identifying the research questions

The first stage is to identify research questions related to the purpose of this study. As stated earlier, this scoping review aims to identify the scope of evidence on the use of infographic as a KT intervention to disseminate research results or evidence-based information (in health-related sectors) to those who can benefit from these. Table 1 describes the core elements of the scoping review using the Population-Concept-Context (PCC) mnemonic (25).

**Table 1 | PCC mnemonic to illustrate the scope and focus of the review**

|            |                                                                                                                                                                                                           |
|------------|-----------------------------------------------------------------------------------------------------------------------------------------------------------------------------------------------------------|
| Population | -Potential knowledge users (a non-scientific audience) such as health professionals, decision makers, patients and families, communities.                                                                 |
| Concept    | -Infographic or any shareable tool that uses striking and engaging visuals to communicate complex evidence-based information in an easy-to-understand way                                                 |
| Context    | - The infographic intervention is used to promote and improve knowledge use (e.g., raise awareness, influence attitudes, increase knowledge, inform practice, change behaviour) in health-related sectors |

Four more specific research questions were identified to guide this review (Figure 1). As the process of conducting a scoping review can be iterative, we will adopt a reflexive approach and research questions will be revised, if needed, as we will become more familiar with the body of evidence.

### Q1 | What do we know about the characteristics of infographic intervention?

First, given the uniqueness of each infographic tested, we will identify the main characteristics of each intervention: *content and visual appearance of the infographic, development process, infographic objective and the target audience and delivery method and context (e.g., online versus printed infographic, targeted mail or social media, infographic used alone versus or combined with other activities)*. The 7 G.R.A.P.H.I.C principles of public health infographic design (*e.g., coherence, colours, alignment, visual hierarchy, charts used, imagery, heading highlight*) will be used as a general framework to extract relevant data related to visual quality of infographic in selected study (12).

### Q2 | What do we know about the outcomes of infographic intervention?

Second, we will identify the available effectiveness data on the use of infographics as a KT intervention. We used the Kirkpatrick model (31) to identify main outcome variables to extract from the selected studies. This model is commonly used to evaluate the results of educational programs or training (32). Thus, data related to knowledge users' reactions after

1  
2 reading the infographic (e.g., appreciation, perceived usefulness, accessibility), learning (e.g.,  
3 knowledge, skills, attitude) and ultimately, observed or reported changes in behaviour will be  
4 extracted.  
5  
6

### 7 8 9 **Q3 | What are the factors that influence infographic outcomes?**

10  
11  
12 Thirdly, many factors can facilitate or hinder the relative effectiveness of infographic  
13 intervention reported in the studies. In this regard, this research question aims to explain why  
14 an intervention is or is not successful. Inspired by implementation science frameworks (33), we  
15 will abstract data on key determinants such as characteristics related to the infographics (what),  
16 knowledge users (who), local, organizational and external contexts (where), and knowledge  
17 dissemination process (how). If enough data are available in the selected studies to answer this  
18 question, we will be able to propose recommendations for developing infographics' intervention  
19 based on best practices.  
20  
21  
22  
23  
24  
25  
26  
27

### 28 **Q4 | What types of research design are used to evaluate infographics?**

29  
30  
31 Finally, we want to provide an accurate portrait of the research practices on infographics'  
32 intervention. To do this, we will extract and analyze data related to *research design used, study*  
33 *population and sample size, indicators and measurement tools used and types of analysis that*  
34 *have been performed.*  
35  
36  
37  
38  
39

40  
41 [Insert Figure 1]

42 **Overview of research questions**  
43  
44

## 45 **Stage 2 | Identifying relevant studies**

### 46 ***Search strategy***

47  
48  
49 The search strategy was developed by the first author (EMC) with a senior information  
50 specialist. Then, it was circulated to the research team and was revised and refined, as  
51 necessary. Search terms will include various keywords and related terms to (1) Knowledge  
52  
53  
54  
55  
56  
57  
58  
59

1  
2 translation (e.g., research dissemination, health communication, knowledge transfer) and (2)  
3 Infographic (e.g., information graphic, data visualization, visual abstract) (See Appendix 1). In  
4 order to capture as many relevant articles as possible, the list of terms will be iteratively revised  
5 after databases searching by the information specialist. The search strategy will not be limited  
6 by study design, year of publication or publication status. Searches will be limited to English  
7 and French language publication due to resource constraints for translation. The search  
8 strategy for the MEDLINE database is presented in Appendix 2. It will be adapted for the other  
9 databases and will also be available from the corresponding author, upon request. The search  
10 strategy will be validated using the *Peer Review of Electronic Search Strategies* (PRESS)  
11 Checklist (34).  
12  
13  
14  
15  
16  
17  
18  
19  
20

### 21 *Information sources*

22  
23  
24  
25 For the purposes of the scoping review, a systematic search of the published and grey  
26 literature will be conducted to identify relevant publications. We will search the following  
27 electronic databases from inception onwards: MEDLINE, Cumulative Index to Nursing and  
28 Allied Health Literature (CINAHL), PsycInfo, Social Science Abstracts, Library and Information  
29 Science Abstracts (LISA), Education Resources Information Center (ERIC) and Cairn. All these  
30 databases were chosen to capture the more comprehensive body of literature possible. A  
31 search of the grey literature (e.g., reports, conference proceedings, theses, working papers,  
32 evaluations) will be conducted using Google Scholar and Google Web search engines.  
33 Reference lists of key articles will also be hand-searched by the review team to capture any  
34 papers missed in the electronic searches. The search in the databases will be conducted by  
35 our information specialist. Then, the results will be imported into *Covidence*, a review  
36 management software, and all duplicate citations will be removed before the study selection  
37 process.  
38  
39  
40  
41  
42  
43  
44  
45  
46  
47  
48

### 49 **Stage 3 | Study selection**

50  
51  
52 Study selection process will consist of two stages: 1) a title and abstract screening, and  
53 2) a full-text screening performed by two reviewers, independently. We will use *Covidence* – a  
54 systematic review software, for efficiently managing all the steps within these stages. Before  
55  
56  
57  
58  
59  
60

1  
2 beginning the screening, the eligibility criteria (inclusion and exclusion) will be pilot tested on a  
3 random sample of citations and they will be modified if low agreement is observed between the  
4 reviewers (e.g., a kappa statistic less than 60%). If the agreement is acceptable, the two  
5 reviewers will independently screen the titles and abstracts of all publications retrieved to  
6 categorize whether the piece of literature is eligible for a full review. To ensure reliability  
7 between reviewers during the study selection process, they will meet regularly to discuss  
8 uncertainties related to eligibility criteria and to resolve conflicts on study selection and reach  
9 consensus. Publications identified as potentially relevant to this scoping review will be retrieved  
10 in full text. After the completion of the first stage and prior the full-text review, the two reviewers  
11 will meet to revise the scope of the review and to refine or extend inclusion and exclusion  
12 criteria, if necessary. The reviewers will also meet regularly during the second stage to discuss  
13 and resolve conflicts. A third party will adjudicate in case of unresolved decisions for inclusion  
14 of studies at any stage. A flowchart using the PRISMA template for the reporting of the selection  
15 process will be produced (Figure 2).  
16  
17  
18  
19  
20  
21  
22  
23  
24  
25  
26  
27  
28  
29

30 [Insert Figure 2]

31 **Flowchart detailing identification and selection of studies for inclusion in the review**

32  
33  
34 ***Inclusion criteria***

35  
36  
37  
38 The inclusion criteria are based on the PCC framework (see Table 1 above). Therefore,  
39 we will include studies that 1) empirically evaluated an infographic tool (i.e., which includes  
40 textual and visual content), 2) that disseminates research results or other health-related  
41 information and 3) targets a non-scientific audience in order to improve knowledge use (e.g.,  
42 influence attitudes, raise awareness, improve knowledge, change practice). Any types of  
43 studies will be eligible for inclusion, and we will not have any time, or publication status  
44 restrictions. Relevant articles that do not meet these inclusion criteria (e.g., theoretical paper  
45 on information design principles, visual literacy) will be held in a separate folder. If necessary,  
46 these and will be used to support data analysis and interpretation.  
47  
48  
49  
50  
51  
52  
53  
54

55 ***Exclusion criteria***

We will exclude the following:

- Studies that do not focus on health-related issues
- Studies that target children like primary school students
- Studies that concern one type of graph or charts (e.g., bar charts, forest plots, 3D graphs)
- Studies that only address interactive data visualization tools (e.g., video, apps, websites)
- Studies that use health data (e.g., personal data contained in electronic health records)
- Studies that use infographics as a form of therapy or clinical intervention
- Studies that focus on developing skills to visualize data
- Studies that do not make the evaluated infographic tool available
- Studies published languages other than French and English

#### Stage 4 | Charting the data

A data extraction form will be developed using Microsoft Excel. Two reviewers will pilot test the form on a random sample of the included articles (10%). They will then meet with the research team to discuss uncertainties and additional potentially relevant information to include in the data extraction form. Data from the remaining articles will be abstracted by one reviewer, and verified by a second reviewer for correctness and completeness. The data extraction form will be iteratively revised if necessary, to ensure its rigour and ability to capture all relevant data to answer the review questions. Table 2 presents the data that will be extracted from all included studies.

**Table 2 | Preliminary data extraction form**

|  | <i>General information</i> | <ul style="list-style-type: none"> <li>- Study title</li> <li>- Author(s)</li> <li>- Year of publication</li> <li>- Country of origin</li> <li>- Topic of the infographic</li> <li>- Terms and concept definition</li> </ul> |
|--|----------------------------|------------------------------------------------------------------------------------------------------------------------------------------------------------------------------------------------------------------------------|
|  |                            |                                                                                                                                                                                                                              |



|    |                                                        |                                                                                                                                                                                                                                                                                                                                                                                                                                                                                                                                                                                                                                     |
|----|--------------------------------------------------------|-------------------------------------------------------------------------------------------------------------------------------------------------------------------------------------------------------------------------------------------------------------------------------------------------------------------------------------------------------------------------------------------------------------------------------------------------------------------------------------------------------------------------------------------------------------------------------------------------------------------------------------|
| Q1 | <b><i>Infographic intervention characteristics</i></b> | <ul style="list-style-type: none"> <li>- Content and visual aspects of the infographic (<i>e.g., coherence, colours, alignment, visual hierarchy, charts used, imagery, heading highlight</i>)</li> <li>- Target audience characteristics (<i>e.g., elderly persons, teenagers, physicians</i>)</li> <li>- Delivery method and context (<i>e.g., online versus printed infographic, targeted mail or social media, infographic used alone versus in addition to other activities</i>).</li> <li>- Development process (<i>e.g., expertise and resources, in collaboration with relevant stakeholders, pilot testing</i>)</li> </ul> |
| Q2 | <b><i>Outcomes characteristics</i></b>                 | <ul style="list-style-type: none"> <li>- Audience's reactions to infographic (<i>e.g., appreciation/reading experience, perceived usefulness/relevance, accessibility/user-friendliness</i>)</li> <li>- Audience's learning (<i>improved knowledge and skills, attitude change</i>)</li> <li>- Audience's behaviour change (<i>e.g., application of learning in practice, decision-making</i>)</li> </ul>                                                                                                                                                                                                                           |
| Q3 | <b><i>Barriers and facilitators</i></b>                | <p>Factors that influenced infographic outcomes:</p> <ul style="list-style-type: none"> <li>- Characteristics related to the infographic</li> <li>- Characteristics related to the knowledge users</li> <li>- Characteristics related to the contexts (<i>local, organizational, external</i>)</li> <li>- Characteristics related to the KT process</li> </ul>                                                                                                                                                                                                                                                                      |
| Q4 | <b><i>Research design</i></b>                          | <ul style="list-style-type: none"> <li>- Study purpose</li> <li>- Methods and research design</li> <li>- Population and sample size</li> <li>- Indicators and measurement tools</li> </ul>                                                                                                                                                                                                                                                                                                                                                                                                                                          |



|  |  |                          |
|--|--|--------------------------|
|  |  | - Types of data analysis |
|--|--|--------------------------|

Because a scoping review aims to identify gaps in the evidence base, we will not conduct a critical appraisal of included articles, which is consistent with guidance on scoping review conduct (23–25).

## Stage 5 | Collating, summarizing and reporting the results

The synthesis stage of this review will involve a descriptive summary and thematic analysis of the extracted data (24). To ensure rigour, two reviewers will conduct the analysis with input from collaborators during the process. A descriptive summary of the selected publications' characteristics (year of publication, country of origin, topics of interest or domain, study design) will be presented using frequencies and percentages. We will also prepare a descriptive summary table of all data extracted from included studies that are aligned with our research questions (based on variables of Q1-Q2-Q4 presented in Table 2). This table will map key findings regarding the measured effectiveness outcomes in each study, the characteristics of the infographic intervention process, and the characteristics of research designs used. A qualitative descriptive summary will accompany the tabulated results to describe how the results relate to our research questions (Q1, Q2 & Q4). Finally, if the extracted data allows it, we will perform a more in-depth qualitative analysis to understand which potential factors influence the outcomes reported in the studies (Q3) (e.g., infographics developed in collaboration with stakeholders or which contain few statistics appear to be more effective). Thus, data related to outcomes results will be discussed in light of the characteristics of the infographics intervention process, in order to understand what can influence their effectiveness. We will use the PRISMA extension designed for scoping reviews to guide the final reporting of this scoping review's results.

## Stage 6 | Consulting with relevant stakeholders

1  
2  
3  
4  
5  
6  
7  
8  
9  
10  
11  
12  
13  
14  
15  
16  
17  
18  
19  
20  
21  
22  
23  
24  
25  
26  
27  
28  
29  
30  
31  
32  
33  
34  
35  
36  
37  
38  
39  
40  
41  
42  
43  
44  
45  
46  
47  
48  
49  
50  
51  
52  
53  
54  
55  
56  
57  
58  
59  
60

Even if it represents an optional stage, consultation can be a relevant and useful component to include in a scoping review process because it adds methodological rigour and enhances the validity and usefulness of the review results (24,35). Since all authors of this protocol are members of a multidisciplinary research team on knowledge translation in Canada (RENARD team), we will mobilize our network. We will develop a consultation panel that includes KT researchers and practitioners, representatives from KB organizations and graduated students. All RENARD members are familiar with the KT research field and/or with developing and implementing KT activities to improve knowledge uptake. The input from these informants on our findings will be essential to 1) provide us additional references to include in the review and 2) add valuable insights on our preliminary results, and 3) develop, contextualize and validate recommendations based on the scoping review's results (e.g., research priorities or criteria for developing effective infographics). The consultation exercise will consist of two focus groups (one with preliminary results and one at the final stage) with approximately 10 stakeholders per group.

### **Patient and public involvement**

Patients and public were not involved in the conception and design of this protocol.

## **ETHICS AND DISSEMINATION**

---

To our knowledge, this will be the first comprehensive scoping review on the use and effectiveness of infographics as a KT intervention to improve knowledge uptake in health. This review will contribute both to KT science and practice. In summary, we will identify where gaps exist in the literature, and research areas that require a systematic review or primary research. This scoping review will be helpful to improve not only the research carried out in this field (e.g., recommendations for study designs, indicators and measurement tools) but may also give support for the development of infographic for KT in the future. In this regard, we will be able to describe what an infographic is and what form this tool can take (offering a common terminology and definition in the KT field), to identify in which context infographics can be effective, and to identify key principles for developing an effective infographic to improve knowledge uptake.

1  
2  
3  
4  
5  
6  
7  
8  
9  
10  
11  
12  
13  
14  
15  
16  
17  
18  
19  
20  
21  
22  
23  
24  
25  
26  
27  
28  
29  
30  
31  
32  
33  
34  
35  
36  
37  
38  
39  
40  
41  
42  
43  
44  
45  
46  
47  
48  
49  
50  
51  
52  
53  
54  
55  
56  
57  
58  
59  
60

Ethics approval was exempt for the present study because no data collection was required. The search strategy and data extraction process are planned to be completed by January 2021 and the results will be ready by June 2021. We will ensure broad dissemination of our scoping review findings through multiple activities: publication in an open-access peer-reviewed international journal, presentation in a relevant KT conference (e.g., *Canadian Knowledge Mobilization Forum*) and preparation of user-friendly KT tool such as webinar, plain language summary and infographic. These will be largely disseminated on our research team's website, newsletter and social media ([www.equiperenard.org](http://www.equiperenard.org)).

**Acknowledgements** We want to thank Julie Desnoyers, the information specialist affiliated to the RENARD research team on knowledge translation at Université de Montréal, for assisting with adapting the search strategy used in this scoping review. We also thank Équipe RENARD - Fonds de recherche du Québec–Société et Culture (FRQ-SC).

**Contributors** EMC, CC, AF and CD conceptualized the study. EMC drafted the protocol. CC, AF and CD critically revised the manuscript. EMC wrote the final draft manuscript and all the authors approved it.

**Funding** The authors have not declared a specific grant for this research from any funding agency in the public, commercial or not-for-profit sectors.

**Competing interests** None declared.

**Patient and public involvement** Patients and/or the public were not involved in the design, or conduct, or reporting, or dissemination plans of this research.

**Patient consent for publication** Not required.

**Provenance and peer review** Not commissioned; externally peer reviewed.

**Word Count** 3514 words (excluding abstract, references and appendices)

## REFERENCES

---

1. Graham ID, Logan J, Harrison MB, Straus SE, Tetroe J, Caswell W, et al. Lost in knowledge translation: Time for a map? *J Contin Educ Health Prof* 2006;26(1):13–24.
2. McKibbin KA, Lokker C, Wilczynski NL, Ciliska D, Dobbins M, Davis DA, et al. A cross-sectional study of the number and frequency of terms used to refer to knowledge translation in a body of health literature in 2006: a Tower of Babel? *Implement Sci* 2010;5(1):16.
3. Straus S, Tetroe J, Graham ID. Knowledge Translation in Health Care: Moving from Evidence to Practice. John Wiley & Sons 2013. 359 p.
4. Canadian Institutes of Health Research (CIHR). Knowledge translation, 2017. Available: <https://cihr-irsc.gc.ca/e/29529.html> [Accessed January 2021]
5. Langer L, Tripney J, Gough D. The science of using science: Researching the use of research evidence in decision-making, 2016. Available: <http://www.alliance4usefulevidence.org/assets/Science-of-Using-Science-Final-Report-2016.pdf> [Accessed January 2021]
6. Graham ID, Tetroe JM. Getting Evidence into Policy and Practice: Perspective of a Health Research Funder. *J Can Acad Child Adolesc Psychiatry* 2009;18(1):46–50.
7. Graham ID, Tetroe J, Gagnon M. Knowledge dissemination: End of grant knowledge translation. In: Straus, S, Tetroe, J, Graham, ID, eds. Knowledge translation in health care: moving from evidence to practice. Toronto : John Wiley & Sons 2013;75–92.
8. Lemire N, Souffez K, Laurendeau M-C. Facilitating a knowledge translation process: Knowledge review and facilitation tool, 2013. Available: [https://www.inspq.qc.ca/pdf/publications/1628\\_FaciliKnowledgeTransProcess.pdf](https://www.inspq.qc.ca/pdf/publications/1628_FaciliKnowledgeTransProcess.pdf) [Accessed January 2021]
9. Lafreniere D, Menuz V, Hurlimann T, Godard B. Knowledge Dissemination Interventions: A Literature Review. *SAGE Open* 2013;3(3): 2158244013498242

10. Bennett G, Jessani N, editors. *The Knowledge Translation Toolkit—Bridging the Know-Do Gap: A Resource for Researchers*. Ottawa: SAGE Publications and International Development Research Centre; 2011. Available: <https://www.idrc.ca/en/book/knowledge-translation-toolkit-bridging-know-do-gap-resource-researchers> [Accessed January 2021]
11. Walter I, Nutley S, Davies H. What works to promote evidence-based practice? A cross-sector review. *Evidence & Policy: A Journal of Research, Debate and Practice*. 2005;1(3):335–64.
12. Stones C, Gent M. *7 G.R.A.P.H.I.C Principles of Public Health Infographic Design*. Leeds: University of Leeds, Public Health England; 2015.
13. Balkac M, Ergun E. Role of Infographics in Healthcare. *Chin Med J* 2018;131(20):2514–7.
14. Scott H, Fawkner S, Oliver C, Murray A. Why healthcare professionals should know a little about infographics. *Br J Sports Med* 2016;50(18):1104–5.
15. Murray IR, Murray AD, Wordie SJ, Oliver CW, Murray AW, Simpson AHRW. Maximising the impact of your work using infographics. *Bone Joint Res* 2017;6(11):619–20.
16. Smiciklas M. *The power of infographics: Using pictures to communicate and connect with your audiences*. 1st Edition. Indianapolis, Ind: Que Publishing; 2012. 224 p.
17. Martin LJ, Turnquist A, Groot B, Huang SYM, Kok E, Thoma B, et al. Exploring the Role of Infographics for Summarizing Medical Literature. *Health Professions Education* 2019;5(1):48–57.
18. Darcy R. Infographics, assessment and digital literacy: innovating learning and teaching through developing ethically responsible digital competencies in public health. In Chew YW, Chan KM, Alphonso A, eds. *Personalised Learning. Diverse Goals. One Heart*. Singapore: *ASCILITE 2019*;112-120.
19. Houts PS, Doak CC, Doak LG, Loscalzo MJ. The role of pictures in improving health communication: A review of research on attention, comprehension, recall, and adherence. *Patient Education and Counseling* 2006;61(2):173–90.

- 1
  - 2
  - 3
  - 4
  - 5
  - 6
  - 7
  - 8
  - 9
  - 10
  - 11
  - 12
  - 13
  - 14
  - 15
  - 16
  - 17
  - 18
  - 19
  - 20
  - 21
  - 22
  - 23
  - 24
  - 25
  - 26
  - 27
  - 28
  - 29
  - 30
  - 31
  - 32
  - 33
  - 34
  - 35
  - 36
  - 37
  - 38
  - 39
  - 40
  - 41
  - 42
  - 43
  - 44
  - 45
  - 46
  - 47
  - 48
  - 49
  - 50
  - 51
  - 52
  - 53
  - 54
  - 55
  - 56
  - 57
  - 58
  - 59
  - 60
20. Buljan I, Malički M, Wager E, Puljak L, Hren D, Kellie F, et al. No difference in knowledge obtained from infographic or plain language summary of a Cochrane systematic review: three randomized controlled trials. *Journal of Clinical Epidemiology* 2018;97:86—94.
21. Crick K, Hartling L. Preferences of knowledge users for two formats of summarizing results from systematic reviews: Infographics and critical appraisals. *PLoS One* 2015;10(10): e0140029.
22. Occa A, Suggs LS. Communicating breast cancer screening with young women: An experimental test of didactic and narrative messages using video and infographics. *Journal of Health Communication* 2016;21(1):1–11.
23. Arksey H, O'Malley L. Scoping studies: towards a methodological framework. *International Journal of Social Research Methodology* 2005;8(1):19–32.
24. Levac D, Colquhoun H, O'Brien KK. Scoping studies: advancing the methodology. *Implementation Science* 2010;5(1):69.
25. Peters M, Godfrey C, McInerney P, Munn Z, Trico A, Khalil H. Chapter 11: Scoping Reviews. In: Aromataris E, Munn Z, eds. *JBIM Manual for Evidence Synthesis*, 2020. Available: <https://doi.org/10.46658/JBIMES-20-12> [Accessed January 2021]
26. Munn Z, Peters MDJ, Stern C, Tufanaru C, McArthur A, Aromataris E. Systematic review or scoping review? Guidance for authors when choosing between a systematic or scoping review approach. *BMC Med Res Methodol* 2018;18(1):143.
27. Grimshaw J. A Guide to Knowledge Synthesis—Canadian Institutes of Health Research, 2010. Available: <http://www.cihr-irsc.gc.ca/e/41382.html> [Accessed January 2021]
28. Tricco AC, Lillie E, Zarin W, O'Brien KK, Colquhoun H, Levac D, et al. PRISMA Extension for Scoping Reviews (PRISMA-ScR): Checklist and Explanation. *Annals of Internal Medicine* 2018;169(7):467–73.
29. Hall A, Furlong B, Pike A, Logan G, Lawrence R, Ryan A, et al. Using theatre as an arts-based knowledge translation strategy for health-related information: a scoping review protocol. *BMJ Open* 2019;9(10):e032738.

- 1  
2  
3  
4  
5  
6  
7  
8  
9  
10  
11  
12  
13  
14  
15  
16  
17  
18  
19  
20  
21  
22  
23  
24  
25  
26  
27  
28  
29  
30  
31  
32  
33  
34  
35  
36  
37  
38  
39  
40  
41  
42  
43  
44  
45  
46  
47  
48  
49  
50  
51  
52  
53  
54  
55  
56  
57  
58  
59  
60
30. Barac R, Stein S, Bruce B, Barwick M. Scoping review of toolkits as a knowledge translation strategy in health. *BMC Medical Informatics and Decision Making* 2014;14(1):121.
  31. Kirkpatrick JD, Kirkpatrick WK. Kirkpatrick's Four Levels of Training Evaluation. Association for Talent Development; 2016. 341 p.
  32. Smidt A, Balandin S, Sigafoos J, Reed VA. The Kirkpatrick model: A useful tool for evaluating training outcomes. *J Intellect Dev Disabil* 2009;34(3):266–74.
  33. Harvey G. PARIHS revisited: from heuristic to integrated framework for the successful implementation of knowledge into practice. *Implementation Science* 2016;11(1):1-13.
  34. McGowan J, Sampson M, Salzwedel DM, Cogo E, Foerster V, Lefebvre C. PRESS Peer Review of Electronic Search Strategies: 2015 Guideline Statement. *Journal of Clinical Epidemiology* 2016;75:40–6.
  35. Tricco AC, Lillie E, Zarin W, O'Brien K, Colquhoun H, Kastner M, et al. A scoping review on the conduct and reporting of scoping reviews. *BMC Med Res Methodol* 2016;16(1):15.

1  
2  
3  
4  
5  
6  
7  
8  
9  
10  
11  
12  
13  
14  
15  
16  
17  
18  
19  
20  
21  
22  
23  
24  
25  
26  
27  
28  
29  
30  
31  
32  
33  
34  
35  
36  
37  
38  
39  
40  
41  
42  
43  
44  
45  
46  
47  
48  
49  
50  
51  
52  
53  
54  
55  
56  
57  
58  
59  
60

## LIST OF FIGURES

---

**Figure 1.** Overview of research questions

**Figure 2.** Flowchart detailing identification and selection of studies for inclusion in the review

For peer review only



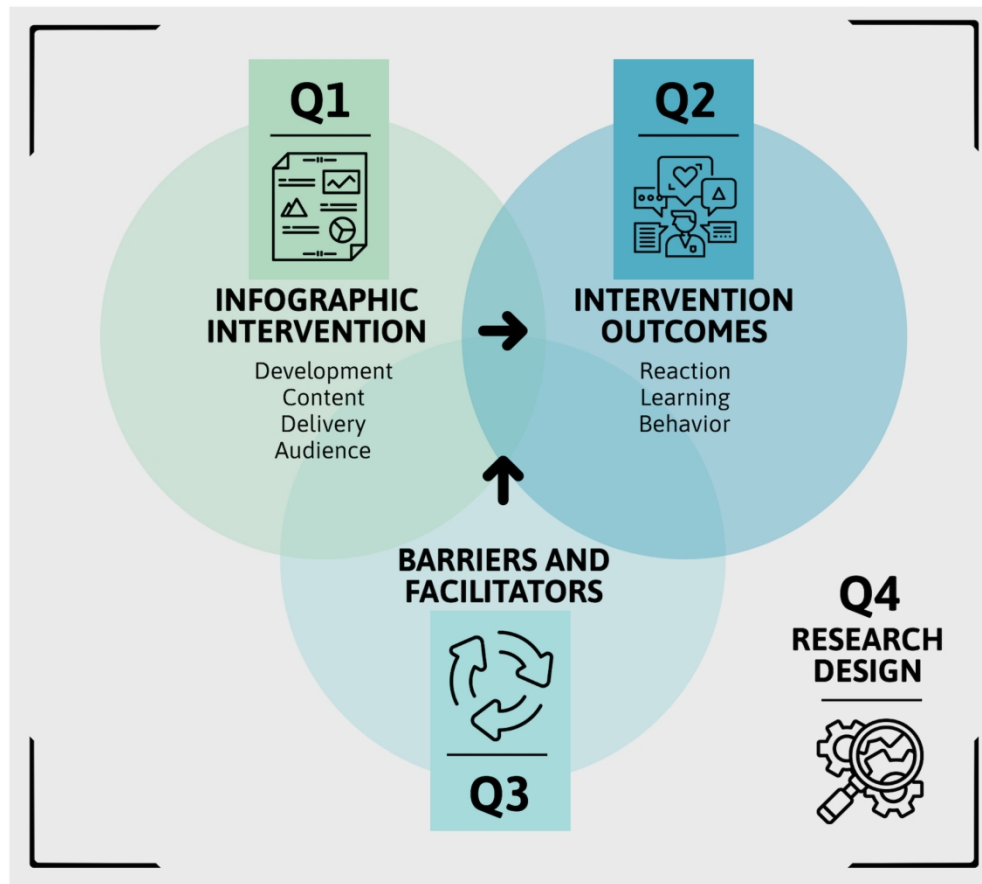

Overview of research questions

162x145mm (300 x 300 DPI)

1  
2  
3  
4  
5  
6  
7  
8  
9  
10  
11  
12  
13  
14  
15  
16  
17  
18  
19  
20  
21  
22  
23  
24  
25  
26  
27  
28  
29  
30  
31  
32  
33  
34  
35  
36  
37  
38  
39  
40  
41  
42  
43  
44  
45  
46  
47  
48  
49  
50  
51  
52  
53  
54  
55  
56  
57  
58  
59  
60

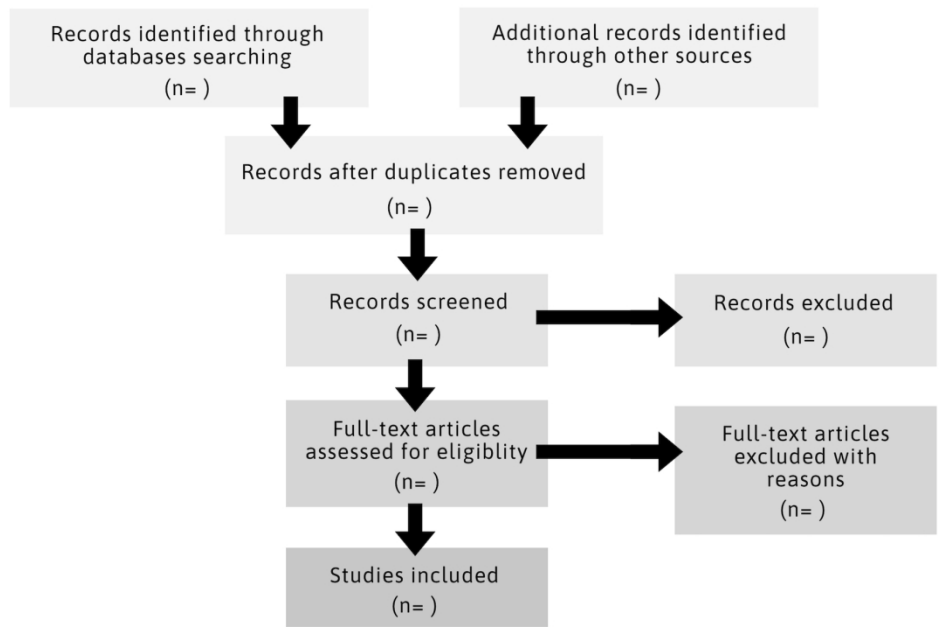

Flowchart detailing identification and selection of studies for inclusion in the review

162x108mm (300 x 300 DPI)

## Appendix 1 | List of terms for the search strategy

| TOOL<br>Terms related to <i>Infographic</i> | PURPOSE<br>Terms related to <i>Knowledge translation</i> |
|---------------------------------------------|----------------------------------------------------------|
| Infographic*                                | Health communicat*                                       |
| Data visuali?ation                          | Information translation                                  |
| Information graphic*                        | Knowledge translation                                    |
| Visual abstract*                            | Knowledge transfer                                       |
| Visual display                              | Health promotion                                         |
| Visual graphic*                             | Health literacy                                          |
| Visual presentation*                        | Health education                                         |
| Visual stor*                                | Science communicat*                                      |
| Datagraphic*                                | Scientific presentation*                                 |
| Graphic* presentation*                      | Research disseminat*                                     |
| Visual* data                                | Research translation                                     |
| Information visuali?ation*                  | Research transfer                                        |
| Graphic* data                               | Information disseminat*                                  |
| Info-graphic*                               | Information communicat*                                  |
|                                             | Research communicat*                                     |
|                                             | Knowledge mobili?ation                                   |
|                                             | Knowledge exchange                                       |
|                                             | Knowledge broker*                                        |
|                                             | Knowledge utili?ation                                    |
|                                             | Knowledge use                                            |
|                                             | Research impact*                                         |
|                                             | Research utili?ation                                     |
|                                             | Evidence use                                             |
|                                             | Evidence-based                                           |
|                                             | Research literature                                      |
|                                             | Medical research                                         |
|                                             | Research evidence                                        |
|                                             | Research data                                            |
|                                             | Scientific knowledge                                     |
|                                             | Health information*                                      |
|                                             | Research result*                                         |
|                                             | Systematic review*                                       |
|                                             | Medical literature                                       |
|                                             | Information retention                                    |
|                                             | Information acquisition                                  |

## Appendix 2 | Search strategy

---

**Database:** Ovid MEDLINE(R) <1946 to present>

**Keywords (title and abstract) :**

((research adj2 literature).ab,ti. OR (medical adj2 research).ab,ti. OR (research adj2 evidence).ab,ti. OR (research adj2 data).ab,ti. OR (scientific adj2 knowledge).ab,ti. OR (health adj2 information\*).ab,ti. OR (research adj2 result\*).ab,ti. OR (systematic adj2 review\*).ab,ti. OR (medical adj2 literature).ab,ti. OR (information adj2 retention).ab,ti. OR (information adj2 translation).ab,ti. OR (knowledge adj2 translation).ab,ti. OR (knowledge adj2 transfer).ab,ti. OR (health adj2 promotion).ab,ti. OR (health adj2 literacy).ab,ti. OR (health adj2 education).ab,ti. OR (health adj2 communicat\*).ab,ti. OR (science adj2 communicat\*).ab,ti. OR (scientific adj2 presentation\*).ab,ti. OR (research adj2 disseminat\*).ab,ti. OR (research adj2 translation).ab,ti. OR evidence-based.ab,ti. OR (evidence adj2 "use").ab,ti. OR (knowledge adj2 mobili?ation).ab,ti. OR (knowledge adj2 exchange).ab,ti. OR (knowledge adj2 broker\*).ab,ti. OR (knowledge adj2 utili?ation).ab,ti. OR (knowledge adj2 "use").ab,ti. OR (research adj2 impact\*).ab,ti. OR (research adj2 utili?ation).ab,ti. OR (research adj2 transfer).ab,ti. OR (information adj2 disseminat\*).ab,ti. OR (information adj2 communicat\*).ab,ti. OR (research adj2 communicat\*).ab,ti. OR (information adj2 acquisition).ab,ti. OR Health Communication/ OR Information Dissemination/ OR Health Promotion/) AND ("infographic\*.ab,ti. OR (data adj2 visuali?ation).ab,ti. OR (information adj2 graphic\*).ab,ti. OR (visual adj2 abstract\*).ab,ti. OR "datagraphic\*.ab,ti. OR (visual adj2 display).ab,ti. OR (visual adj2 graphic\*).ab,ti. OR (visual adj2 presentation\*).ab,ti. OR (visual adj2 stor\*).ab,ti. OR (graphic\* adj2 presentation\*).ab,ti. OR (information adj2 visuali?ation\*).ab,ti. OR (visual\* adj2 data).ab,ti. OR (graphic\* adj2 data).ab,ti. OR "info-graphic\*.ab,ti. OR data visualization/)

# BMJ Open

## The use of infographics as a health-related knowledge translation tool: protocol for a scoping review

|                                 |                                                                                                                                                                                                                                                                                                                                                                                                              |
|---------------------------------|--------------------------------------------------------------------------------------------------------------------------------------------------------------------------------------------------------------------------------------------------------------------------------------------------------------------------------------------------------------------------------------------------------------|
| Journal:                        | <i>BMJ Open</i>                                                                                                                                                                                                                                                                                                                                                                                              |
| Manuscript ID                   | bmjopen-2020-046117.R2                                                                                                                                                                                                                                                                                                                                                                                       |
| Article Type:                   | Protocol                                                                                                                                                                                                                                                                                                                                                                                                     |
| Date Submitted by the Author:   | 19-Apr-2021                                                                                                                                                                                                                                                                                                                                                                                                  |
| Complete List of Authors:       | Mc Sween-Cadieux, Esther; University of Montreal, Psychology<br>Chabot, Catherine; University of Montreal, Psychology<br>Fillol, Amandine; University of Montreal, School of Public Health; Institut de recherche pour le développement, CEPED - IRD-Université de Paris - ERL INSERM SAGESUD<br>Saha, Trisha; University of Montreal, Psychology<br>Dagenais, Christian; University of Montreal, Psychology |
| <b>Primary Subject Heading</b>: | Public health                                                                                                                                                                                                                                                                                                                                                                                                |
| Secondary Subject Heading:      | Medical education and training, Evidence based practice, Communication, Public health                                                                                                                                                                                                                                                                                                                        |
| Keywords:                       | SOCIAL MEDICINE, PUBLIC HEALTH, MEDICAL EDUCATION & TRAINING                                                                                                                                                                                                                                                                                                                                                 |
|                                 |                                                                                                                                                                                                                                                                                                                                                                                                              |

SCHOLARONE™  
Manuscripts



I, the Submitting Author has the right to grant and does grant on behalf of all authors of the Work (as defined in the below author licence), an exclusive licence and/or a non-exclusive licence for contributions from authors who are: i) UK Crown employees; ii) where BMJ has agreed a CC-BY licence shall apply, and/or iii) in accordance with the terms applicable for US Federal Government officers or employees acting as part of their official duties; on a worldwide, perpetual, irrevocable, royalty-free basis to BMJ Publishing Group Ltd ("BMJ") its licensees and where the relevant Journal is co-owned by BMJ to the co-owners of the Journal, to publish the Work in this journal and any other BMJ products and to exploit all rights, as set out in our [licence](#).

The Submitting Author accepts and understands that any supply made under these terms is made by BMJ to the Submitting Author unless you are acting as an employee on behalf of your employer or a postgraduate student of an affiliated institution which is paying any applicable article publishing charge ("APC") for Open Access articles. Where the Submitting Author wishes to make the Work available on an Open Access basis (and intends to pay the relevant APC), the terms of reuse of such Open Access shall be governed by a Creative Commons licence – details of these licences and which [Creative Commons](#) licence will apply to this Work are set out in our licence referred to above.

Other than as permitted in any relevant BMJ Author's Self Archiving Policies, I confirm this Work has not been accepted for publication elsewhere, is not being considered for publication elsewhere and does not duplicate material already published. I confirm all authors consent to publication of this Work and authorise the granting of this licence.

1  
2  
3  
4  
5  
6  
7  
8 **The use of infographics as a health-related knowledge translation tool: protocol for a scoping**  
9 **review**

10  
11  
12 *Esther Mc Sween-Cadieux<sup>1</sup>*

13  
14  
15  
16 *Catherine Chabot<sup>1</sup>,*

17  
18  
19  
20 *Amandine Fillo<sup>2,3</sup>*

21  
22  
23 *Trisha Saha<sup>1</sup>*

24  
25  
26  
27 *Christian Dagenais<sup>1</sup>*

28  
29  
30  
31  
32  
33 **Author affiliations**  
34

---

35  
36  
37 <sup>1</sup> Department of Psychology, University of Montreal, Montreal, Quebec, Canada

38  
39  
40 <sup>2</sup> School of Public Health, University of Montreal, Montreal, Quebec, Canada.

41  
42  
43  
44 <sup>3</sup> CEPED, Institute for Research on Sustainable Development, IRD-Université de Paris, ERL  
45 INSERM SAGESUD, Paris, France

46  
47  
48  
49  
50 **Corresponding author**  
51

---

52  
53  
54 Esther Mc Sween-Cadieux, Ph.D  
55 esther.mcsween-cadieux@umontreal.ca  
56  
57

1  
2  
3  
4  
5  
6  
7  
8  
9  
10  
11  
12  
13  
14  
15  
16  
17  
18  
19  
20  
21  
22  
23  
24  
25  
26  
27  
28  
29  
30  
31  
32  
33  
34  
35  
36  
37  
38  
39  
40  
41  
42  
43  
44  
45  
46  
47  
48  
49  
50  
51  
52  
53  
54  
55  
56  
57  
58  
59  
60

ORCID iD - <https://orcid.org/0000-0001-5403-0035>

For peer review only



## ABSTRACT

---

**Introduction.** Efforts to bridge the *know-do gap* paved the way for the development of knowledge translation (KT). KT aims to understand how to effectively promote and support the use of evidence through different activities and strategies. As a dissemination activity, infographics are gaining popularity as a promising KT tool to reach multiple health research users (e.g., health practitioners, patients and families, and decision makers). However, to our knowledge, no study has been conducted to map the available evidence on this KT tool using a systematic method. Therefore, this scoping review will explore the depth and breadth of evidence on the use and effectiveness of infographics to improve research uptake (e.g., raising awareness, influencing attitudes, increasing knowledge, informing practice, changing behaviour).

**Methods and analysis.** We will use the scoping review methodological framework first proposed by Arksey and O'Malley (2005), improved by Levac and colleagues (2010) and further refined by the Joanna Briggs Institute (2020). The search strategy will be conducted in MEDLINE, CINAHL, PsycInfo, Social Science Abstracts, LISA, ERIC, Cairn and Google Scholar. We will also search for relevant literature from the reference lists of the included articles. Study selection will be conducted by two independent reviewers. All study designs will be eligible for inclusion, with no date, or publication status restrictions. The included studies will have evaluated an infographic that disseminates health research and targets a non-scientific audience. A data extraction form will be standardized and used to extract and chart the data, which will then be synthesized to present a descriptive summary of the results.

**Ethics and dissemination.** Ethics approval is not required. In order to inform the research and KT communities, different dissemination activities will be developed including user-friendly KT tools (e.g., webinar, fact sheet and infographic) and open-access publication and presentations in KT events and conferences.

## KEYWORDS

---

1  
2  
3  
4  
5  
6  
7  
8  
9  
10  
11  
12  
13  
14  
15  
16  
17  
18  
19  
20  
21  
22  
23  
24  
25  
26  
27  
28  
29  
30  
31  
32  
33  
34  
35  
36  
37  
38  
39  
40  
41  
42  
43  
44  
45  
46  
47  
48  
49  
50  
51  
52  
53  
54  
55  
56  
57  
58  
59  
60

Infographic, dissemination, knowledge translation, knowledge uptake, effectiveness, scoping review, health research.

For peer review only

## STRENGTHS AND LIMITATIONS OF THIS STUDY

---

→ This scoping review is the first known to systematically uncover and synthesize literature related to the use and effectiveness of infographics to improve knowledge uptake in health.

→ This protocol adheres to Levac et al.'s methodological guidelines (2010) built on Arksey and O'Malley's original framework (2005) and the guidelines from the Joanna Briggs Institute (2020).

→ This review will include multiple reviewers in all phases of study selection and data extraction in order to reduce bias and errors.

→ A limitation of this study is that only literature in English and French will be included, which will limit the scope of this review.

→ Following accepted scoping review guidelines, this review will not formally assess the quality of the included studies, limiting our ability to assess the strength of existing evidence.

## BACKGROUND

---

### Knowledge translation

Efforts to mobilize the phenomenal amount of research results and evidence-based information have paved the way for the development of the knowledge translation field (KT) (1–3). According to the *Canadian Institutes of Health Research*, KT is defined as “a dynamic and iterative process that include synthesis, dissemination, exchange and ethically-sound application of knowledge” to improve health, health service delivery and the healthcare system (4). KT science aims to understand how to promote and effectively support the use of evidence through different KT activities and strategies (5). The choice of activities will vary according to the KT objective (e.g., raising awareness, improving action through a change of practice among professionals, influencing political decision-making, mobilizing public action), the knowledge users’ needs, the implementation context and the nature and type of knowledge to be shared (6).

In this study, our focus of interest will be on dissemination activities which require expertise in communication and vulgarization (1,7,8). The primary goal of dissemination activities is to “make new knowledge understandable and accessible so as to effectively reach the groups of actors concerned” (p.30) (8). Studies show that the passive dissemination of documents poorly suited to the preferences and characteristics of the target audience is often ineffective (5,8,9). For this purpose, the KT field emphasizes the importance of developing dissemination tools that are attractive and adapted to users’ preferences (5). For example, dissemination activities may be a summary sheet or an infographic, a practice guide, a newsletter, brochures, leaflets, policy briefs, cartoons, videos, books, reports, plain-language articles, etc. (8,10,11). Thanks to the KT movement, research dissemination is no longer limited to peer-reviewed publications and scientific conferences and now, more and more innovative and promising tools are used for knowledge sharing. This project will specifically focus on one of these tools, namely infographics (12–14).

### Infographics for knowledge translation

1  
2  
3  
4  
5  
6  
7  
8  
9  
10  
11  
12  
13  
14  
15  
16  
17  
18  
19  
20  
21  
22  
23  
24  
25  
26  
27  
28  
29  
30  
31  
32  
33  
34  
35  
36  
37  
38  
39  
40  
41  
42  
43  
44  
45  
46  
47  
48  
49  
50  
51  
52  
53  
54  
55  
56  
57  
58  
59  
60

Infographics, an abbreviated term for *information graphic*—are increasingly popular in the digital age in which we live (15–17). Although its popularity seems to be increasing, data visualisation is not a new phenomenon as it has been used for many centuries in the forms of maps or illustrations (18). While no single definition of the term infographic has gained wide acceptance, infographics are often understood as an eye-catching one-page document that uses striking and engaging visuals to communicate complex evidence-based information in an attractive and easily understandable way (17,19,20). In other words, an infographic “*uses visual cues, illustrations and large typography to display facts in a long, vertical orientation, and are distributed through print media, embedded into websites, and shared on social media*” (p.2) (21). It also usually presents information in a logical manner to tell a story (13–15,22).

Infographics are now everywhere and are used by many different industries: business, environment, food, finance, politics and the healthcare sector (14). When infographics are used for health communication purposes, it is expected that they capture users' attention, help them better understand the information presented, increase their ability to retain and recall the message and encourage users to act in accordance with the information (23). Infographics are thus gaining more and more ground as a promising research or health information dissemination tool to reach multiple potential knowledge users such as health practitioners, patients and families, decision makers or community members. Several initiatives from the research community aim to produce and distribute infographics in scientific journals or on social media (e.g., Twitter, Facebook, LinkedIn, Pinterest, Instagram). Moreover, because of the recent emergence of easy-to-use software for producing infographics, it appears that they are now used as the go-to tool in different contexts, targeting different audiences, and using different formats and designs. Thus, it is important to conduct studies on infographics to better understand their real effectiveness in improving knowledge uptake and to highlight best practices to design, produce and share them. In this regard, many empirical studies have been carried out to study infographics as an intervention tool for disseminating research results or evidence-based information (20,24–26).

## Purpose

To our knowledge, no systematic review has been carried out to map the available evidence on the effectiveness of infographics in supporting dissemination, and such without restrictions regarding for instance study designs and evidence sources. Although a review of literature was made related to this topic of interest (27), our review differs by its systematic methodology specific to scoping reviews, its inclusion of all study designs, and the addition of up-to-date references past 2015, which is significant as there has been an important number of new studies using infographics in the past 5 years. Therefore, our overarching goal is to explore the depth and breadth of evidence about the use and effectiveness of infographics as a KT intervention tool to improve knowledge uptake (e.g., raising awareness, influencing attitudes, increasing knowledge, informing practice, changing behaviour) in health. In order to achieve this, we will conduct a scoping review as an evidence synthesis approach. This approach is recommended when the purpose is, for example, to clarify key concepts and definitions in the literature, to identify key characteristics or factors related to a concept or to examine how research is conducted on a certain topic (28). According to the Canadian Institutes of Health Research, a scoping review is “*undertaken when feasibility is a concern—either because the potentially relevant literature is thought to be especially vast and diverse (varying by method, theoretical orientation or discipline) or there is a suspicion that not enough literature exists.*” (p.34) (29). Therefore, a scoping review is particularly useful to identify knowledge gaps in order to inform future research priorities.

## METHODS AND ANALYSIS

---

To guide the scoping review methodology, we will primarily use the scoping review methodological framework first proposed by Arksey and O’Malley (2005) (30), improved by Levac, Colquhoun and O’Brien (2010) (31) and further refined by the Joanna Briggs Institute (2020) (32). A scoping review includes six key phases: (i) identifying the research questions; (ii) identifying relevant studies; (iii) selecting studies; (iv) charting the data; (v) collating, summarizing and reporting the results and (vi) consulting with relevant stakeholders. This protocol is congruent with the PRISMA-ScR checklist (*Preferred Reporting Items for Systematic Reviews and Meta-Analyses: Extension for scoping reviews*), as will be the reporting of the scoping review (33). This scoping review protocol is inspired and based on previous scoping reviews on similar KT activities and tools (34,35).

## Stage 1 | Identifying the research questions

The first stage is to identify research questions related to the purpose of this study. As stated earlier, this scoping review aims to identify the scope of evidence on the use of infographics as a KT intervention tool to disseminate research results or evidence-based information (in health-related sectors) to those who can benefit from these. Table 1 describes the core elements of the scoping review using the Population-Concept-Context (PCC) mnemonic (32).

|            |                                                                                                                                                                                                           |
|------------|-----------------------------------------------------------------------------------------------------------------------------------------------------------------------------------------------------------|
| Population | - Potential knowledge users (a non-scientific audience) such as health professionals, decision makers, patients and families, and communities.                                                            |
| Concept    | - An infographic or any shareable tool that uses striking and engaging visuals to communicate complex evidence-based information in an easy-to-understand way.                                            |
| Context    | - The infographic intervention is used to promote and improve knowledge use (e.g., raise awareness, influence attitudes, increase knowledge, inform practice, change behaviour) in health-related sectors |

Five specific research questions were identified to guide this review. As the process of conducting a scoping review can be iterative, we will adopt a reflexive approach and research questions will be revised if needed, as we will become more familiar with the body of evidence.

### Question 1 | What is an infographic?

Given the recent popularity of infographics for knowledge translation and in order to clarify the nature of this tool, we want to know more about the terms and definitions offered to characterize infographics in the literature. In addition, we will document the theories or conceptual frameworks most used to study infographics (e.g., *dual-coding theory*, *cognitive load theory*, *theory of planned behavior*, etc.).

## Question 2 | Why are infographics used, for whom and what do they contain?

Next, we will identify the main characteristics of the studied infographics such as their goals (e.g., to raise awareness, influence attitudes, increase knowledge, inform practice, change behaviour), the nature of their content in relation to the information presented, the target audiences, the process used to develop the tool as well as the visual appearance and format of the infographics. The 7 G.R.A.P.H.I.C principles of public health infographic design (*e.g., coherence, colours, alignment, visual hierarchy, charts used, imagery, heading highlight*) will be used as a general framework to extract relevant data related to the visual quality of the infographics in selected studies (12).

## Question 3 | How is research conducted in the field of health infographics?

Moreover, we want to provide a portrait on how empirical studies on infographics are designed. As such, from each of the selected studies, we will extract and analyze the data related to its research design (e.g., research objectives, methods, comparator and study procedure), the study population, the sample size, the indicators (outcomes of interest), the measurement tools and the types of analysis performed. We will also document how the infographics were delivered in the studies (e.g., online versus printed infographic, targeted mail or social media, etc.).

## Question 4 | How effective have infographics been in achieving their goals?

We will also document the evidence of effectiveness available on the use of infographics as a KT intervention, according to the objectives of the studied infographic (e.g., to raise awareness, influence attitudes, increase knowledge, inform practice, change behaviour). The ability of the studies to demonstrate the effectiveness of their infographics in relation to the outcomes of interest will enable trends to be traced on the potential of this tool. Finally, we will document the authors' conclusions on perceived barriers and enablers to the measured effectiveness of infographics.

## Question 5 | What are the knowledge gaps and future research needs?



1  
2  
3  
4 This last question aims to outline the persisting knowledge gaps. To do this, the main  
5 limitations of the selected studies will be described to subsequently highlight the questions that  
6 remain unanswered. We hope to be able to make certain recommendations on the needs for  
7 future research in order to continue the advancement of knowledge.  
8  
9  
10  
11  
12  
13

## 14 **Stage 2 | Identifying relevant studies**

### 15 ***Search strategy***

16  
17  
18  
19  
20  
21 The search strategy was developed by the first author (EMC) with a senior information  
22 specialist. Then, it was circulated to the research team and was revised and refined, as  
23 necessary. Search terms will include various keywords and related terms to (1) *Knowledge*  
24 *translation* (e.g., research dissemination, health communication, knowledge transfer) and (2)  
25 *Infographic* (e.g., information graphic, data visualization, visual graphic) (See Appendix 1). In  
26 order to capture as many relevant articles as possible, the list of terms will be iteratively revised  
27 after databases searching by the information specialist. The search strategy will not be limited  
28 by study design, year of publication or publication status. Searches will be limited to English  
29 and French language publications due to resource constraints. The search strategy for the  
30 MEDLINE database is presented in Appendix 2. It will be adapted for the other databases and  
31 will also be available from the corresponding author, upon request. The search strategy will be  
32 validated using the *Peer Review of Electronic Search Strategies* (PRESS) Checklist (36).  
33  
34  
35  
36  
37  
38  
39  
40  
41  
42  
43

### 44 ***Information sources***

45  
46  
47 For the purposes of the scoping review, a systematic search of the published and grey  
48 literature will be conducted to identify relevant publications. We will search the following  
49 electronic databases from inception onwards: MEDLINE, Cumulative Index to Nursing and  
50 Allied Health Literature (CINAHL), PsycInfo, Social Science Abstracts, Library and Information  
51 Science Abstracts (LISA), Education Resources Information Center (ERIC) and Cairn. All these  
52 databases were chosen to capture the most comprehensive body of literature possible. A  
53  
54  
55  
56  
57  
58  
59  
60

1  
2 search of the grey literature (e.g., reports, conference proceedings, theses, working papers,  
3 evaluations) will be conducted using Google Scholar and Google Web search engines.  
4 Reference lists of key articles will also be hand-searched by the review team to capture any  
5 paper missed in the electronic searches. The search in the databases will be conducted by our  
6 information specialist. Then, the results will be imported into *Covidence*, a review management  
7 software, and all duplicate citations will be removed before the study selection process.  
8  
9  
10  
11  
12  
13

### 14 **Stage 3 | Study selection**

15  
16  
17 Study selection process will consist of two stages: 1) a title and abstract screening, and  
18 2) a full-text screening performed by two reviewers, independently. We will use *Covidence* – a  
19 systematic review software, to efficiently manage all the steps within these stages. Before  
20 beginning the screening, the eligibility criteria (inclusion and exclusion) will be pilot tested on a  
21 random sample of citations and they will be modified if low agreement is observed between the  
22 reviewers (e.g., a kappa statistic less than 60%). If the agreement is acceptable, the two  
23 reviewers will independently screen the titles and abstracts of all publications retrieved to  
24 categorize whether the piece of literature is eligible for a full review. To ensure reliability  
25 between reviewers during the study selection process, they will meet regularly to discuss  
26 uncertainties related to eligibility criteria and to resolve conflicts on study selection to reach  
27 consensus. Publications identified as potentially relevant to this scoping review will be retrieved  
28 in full text. After the completion of the first stage and prior to the full-text review, the two  
29 reviewers will meet to revise the scope of the review and to refine or extend inclusion and  
30 exclusion criteria, if necessary. The reviewers will also meet regularly during the second stage  
31 to discuss and resolve conflicts. A third party will adjudicate in case of unresolved decisions  
32 related to the inclusion of a study at any stage. A flowchart using the PRISMA template for the  
33 reporting of the selection process will be produced (Figure 1).  
34  
35  
36  
37  
38  
39  
40  
41  
42  
43  
44  
45  
46  
47  
48  
49

50 [Insert Figure 1]

51 **Flowchart detailing identification and selection of studies for inclusion in the review**

### 52 ***Inclusion criteria***

1  
2  
3  
4 The inclusion criteria are based on the PCC framework (see Table 1 above). Therefore, we will  
5 include studies that:  
6  
7

- 8  
9
- 10 • Empirically evaluate an infographic tool (i.e., which includes textual and visual content)
  - 11 • Disseminate research results or other health-related information
  - 12 • Target a non-scientific audience in order to improve knowledge use (e.g., to influence
  - 13 attitudes, raise awareness, improve knowledge, change practice).
  - 14
  - 15
- 16

17  
18 All study designs will be eligible for inclusion, and we will not have any time, or publication  
19 status restrictions. Relevant articles that do not meet these inclusion criteria (e.g., theoretical  
20 paper on information design principles, visual literacy) will be held in a separate folder. If  
21 necessary, they will be used to support data analysis and interpretation.  
22  
23

### 24 25 26 *Exclusion criteria*

27  
28  
29  
30 We will exclude studies that:

- 31 • Do not focus on health-related issues
- 32 • Target children like primary school students
- 33 • Concern one type of graph or charts (e.g., bar charts, forest plots, 3D graphs)
- 34 • Only address interactive data visualization tools (e.g., video, apps, websites)
- 35 • Use health data (e.g., personal data contained in electronic health records)
- 36 • Use infographics as a form of therapy or clinical intervention
- 37 • Focus on developing skills to visualize data
- 38 • Do not make the evaluated infographic tool available
- 39 • Are published in languages other than French and English
- 40
- 41
- 42
- 43
- 44
- 45
- 46
- 47
- 48

### 49 **Stage 4 | Charting the data**

50  
51  
52 A data extraction form will be developed using Microsoft Excel. Two reviewers will pilot  
53 test the form on a random sample of the included articles (10%). They will then meet with the  
54 research team to discuss uncertainties and additional potentially relevant information to include  
55  
56  
57  
58  
59

in the data extraction form. Data from the remaining articles will be abstracted by one reviewer and verified by a second reviewer to assure correctness and completeness. The data extraction form will be iteratively revised if necessary, to ensure its rigour and ability to capture all relevant data to answer the review questions. Table 2 presents the data that will be extracted from all included studies.

| <b>Table 2   Preliminary data extraction form</b> |                                                                       |                                                                                                                                                                                                                                                                                                                                                               |
|---------------------------------------------------|-----------------------------------------------------------------------|---------------------------------------------------------------------------------------------------------------------------------------------------------------------------------------------------------------------------------------------------------------------------------------------------------------------------------------------------------------|
|                                                   | <b><i>General information</i></b>                                     | <ul style="list-style-type: none"> <li>- Study title</li> <li>- Author(s)</li> <li>- Year of publication</li> <li>- Country of origin</li> <li>- Topic of the infographic</li> <li>- Type of article and journal</li> </ul>                                                                                                                                   |
| <b>Q1</b>                                         | <b>What is an infographic?</b>                                        | <ul style="list-style-type: none"> <li>- Terms used and concept definition</li> <li>- Theory or conceptual framework used</li> </ul>                                                                                                                                                                                                                          |
| <b>Q2</b>                                         | <b>Why are infographics used, for whom and what do they contain?</b>  | <ul style="list-style-type: none"> <li>- Infographic's goals</li> <li>- Infographic content</li> <li>- Target audience characteristics</li> <li>- Visual aspect and format</li> <li>- Development process</li> </ul>                                                                                                                                          |
| <b>Q3</b>                                         | <b>How is research conducted in the field of health infographics?</b> | <ul style="list-style-type: none"> <li>- Study purpose (research questions/hypothesis)</li> <li>- Research design and comparator (if experimental study)</li> <li>- Study procedure and delivery method</li> <li>- Population and sample size</li> <li>- Indicators (outcomes of interest) and measurement tools</li> <li>- Types of data analysis</li> </ul> |

|    |                                                                       |                                                                                                                                                                                    |
|----|-----------------------------------------------------------------------|------------------------------------------------------------------------------------------------------------------------------------------------------------------------------------|
| Q4 | <b>How effective have infographics been in achieving their goals?</b> | <ul style="list-style-type: none"> <li>- Main quantitative results / outcomes</li> <li>- Main qualitative results / outcomes</li> <li>- Perceived barriers and enablers</li> </ul> |
| Q5 | <b>What are the knowledge gaps and future research needs?</b>         | <ul style="list-style-type: none"> <li>- Study limitations</li> <li>- Future research needs</li> </ul>                                                                             |

Since a scoping review aims to identify gaps in the evidence base, we will not conduct a critical appraisal of the included articles, which is consistent with guidance on scoping review conduct .

## Stage 5 | Collating, summarizing and reporting the results

The synthesis stage of this review will involve a descriptive summary and thematic analysis of the extracted data (31). To ensure rigour, two reviewers will conduct the analysis with input from collaborators during the process. A descriptive summary of the selected publications' characteristics (year of publication, country of origin, health topic, type of article) will be presented using frequencies and percentages. We will also prepare descriptive summary tables of all data extracted from included studies that are aligned with our research questions (based on variables of research questions presented in Table 2). These tables will map key findings regarding infographic definitions and theories used, characteristics of the studied infographics (goals, content, target audience, visual and format and development process), characteristics of the research designs used, outcomes of interest used to measure infographic's effectiveness, main results, author conclusions and future research needs. A qualitative descriptive summary will accompany the tabulated results to describe how the results relate to our research questions. Finally, if the extracted data allows it, a more in-depth qualitative analysis will be conducted so that the evidence of effectiveness is discussed or nuanced in light of potential barriers and enablers, as stated by the authors. We will use the

1  
2 PRISMA extension designed for scoping reviews to guide the final reporting of this scoping  
3 review's results.  
4  
5  
6

## 7 **Stage 6 | Consulting with relevant stakeholders**

8  
9

10  
11 Even if it represents an optional stage, consultation can be a relevant and useful  
12 component to include in a scoping review process because it adds methodological rigour and  
13 enhances the validity and usefulness of the review results (31,37). Since all authors of this  
14 protocol are members of a multidisciplinary research team on knowledge translation in Canada  
15 (RENARD team), we will mobilize our network. We will develop a consultation panel that  
16 includes KT researchers and practitioners, representatives from KB organizations and  
17 graduated students. All RENARD members are familiar with the KT research field and/or with  
18 developing and implementing KT activities to improve knowledge uptake. The input from these  
19 informants on our findings will be essential to 1) provide us additional references to include in  
20 the review and 2) add valuable insights on our preliminary results, and 3) develop, contextualize  
21 and validate recommendations based on the scoping review's results (e.g., research priorities  
22 or criteria for developing effective infographics). The consultation exercise will consist of two  
23 focus groups (one with preliminary results and one at the final stage) with approximately 10  
24 stakeholders per group.  
25  
26  
27  
28  
29  
30  
31  
32  
33  
34  
35  
36

### 37 **Patient and public involvement**

38 Patients and public were not involved in the conception and design of this protocol.  
39  
40  
41  
42

## 43 **ETHICS AND DISSEMINATION**

---

44  
45  
46 To our knowledge, this will be the first comprehensive and systematic scoping review on  
47 the use and effectiveness of infographics as a KT intervention tool to improve knowledge uptake  
48 in the health sector. This review will contribute both to dissemination science and practice. In  
49 summary, we will identify where gaps exist in the literature as well as research areas that  
50 require a systematic review or a primary research. This scoping review will be helpful to improve  
51 not only the research carried out in this field (e.g., recommendations for study designs,  
52 indicators and measurement tools) but also to offer preliminary guidelines to those who plan to  
53  
54  
55  
56  
57  
58  
59  
60

1  
2 use infographics for KT. In this regard, we will be able to describe what an infographic is and  
3 what form this tool can take (offering a common terminology and definition in the KT field), to  
4 identify in which contexts infographics can be effective and for what purpose, and to identify  
5 key principles to consider when developing an infographic for knowledge translation.  
6  
7  
8  
9

10  
11 Ethics approval was exempt for the present study because no data collection was  
12 required. The search strategy and data extraction process are planned to be completed by April  
13 2021 and the results will be ready by July 2021. Thereafter, a knowledge translation plan will  
14 be developed to disseminate this scoping review's results. The main objectives will be to inform  
15 the research and KT communities on the state of knowledge on this increasingly popular tool,  
16 and to raise awareness on their potential usefulness (or non-usefulness) in certain contexts,  
17 depending on the conclusions of our review. To achieve these goals, we will use a combination  
18 of different user-friendly KT activities such as webinars, fact sheet summaries and infographics.  
19 They will be largely disseminated on our research team's website, newsletters, and social  
20 medias (www.equiperenard.org). The results will also be published in an open-access peer-  
21 reviewed international journal and presented in relevant KT conferences or events (e.g.,  
22 *Canadian Knowledge Mobilization Forum*).  
23  
24  
25  
26  
27  
28  
29  
30  
31  
32

33  
34 **Acknowledgements** We want to thank Julie Desnoyers, the information specialist affiliated to  
35 the RENARD research team on knowledge translation at Université de Montréal, for assisting  
36 with adapting the search strategy used in this scoping review. We also want to thank Équipe  
37 RENARD - Fonds de recherche du Québec–Société et Culture (FRQ-SC).  
38  
39  
40  
41

42  
43 **Contributors** EMC, CC, AF, TS and CD conceptualized the study. EMC drafted the protocol.  
44 CC, AF, TS and CD critically revised the manuscript. EMC and TS wrote the final draft  
45 manuscript and all the authors approved it.  
46  
47  
48

49  
50 **Funding** The authors have not declared a specific grant for this research from any funding  
51 agency in the public, commercial or not-for-profit sectors.  
52  
53

54  
55 **Competing interests** None declared.  
56  
57  
58  
59  
60

1  
2  
3  
4  
5  
6  
7  
8  
9  
10  
11  
12  
13  
14  
15  
16  
17  
18  
19  
20  
21  
22  
23  
24  
25  
26  
27  
28  
29  
30  
31  
32  
33  
34  
35  
36  
37  
38  
39  
40  
41  
42  
43  
44  
45  
46  
47  
48  
49  
50  
51  
52  
53  
54  
55  
56  
57  
58  
59  
60

**Patient consent for publication** Not required.

**Provenance and peer review** Not commissioned, externally peer reviewed.

**Word Count** 3593 words (excluding abstract, references and appendices)

For peer review only



## REFERENCES

---

1. Graham ID, Logan J, Harrison MB, Straus SE, Tetroe J, Caswell W, et al. Lost in knowledge translation: Time for a map? *Journal of Continuing Education in the Health Professions*. 2006;26(1):13–24.
2. McKibbin KA, Lokker C, Wilczynski NL, Ciliska D, Dobbins M, Davis DA, et al. A cross-sectional study of the number and frequency of terms used to refer to knowledge translation in a body of health literature in 2006: a Tower of Babel? *Implementation Science*. 2010;5(1):16.
3. Straus S, Tetroe J, Graham ID. Knowledge Translation in Health Care: Moving from Evidence to Practice. John Wiley & Sons; 2013. 359 p.
4. Canadian Institutes of Health Research (CIHR). Knowledge translation, 2017. Available from: <https://cihr-irsc.gc.ca/e/29529.html> [Accessed January 2021]
5. Langer L, Tripney J, Gough D. The science of using science: Researching the use of research evidence in decision-making. London: EPPI-Centre, Social Science Research Unit, UCL Institute of Education, University College London ; 2016. 57 p.
6. Graham ID, Tetroe JM. Getting Evidence into Policy and Practice: Perspective of a Health Research Funder. *J Can Acad Child Adolesc Psychiatry* 2009;18(1):46–50.
7. Graham ID, Tetroe J, Gagnon M. Knowledge dissemination: End of grant knowledge translation. In: Straus, S, Tetroe, J, Graham, ID, eds. Knowledge translation in health care: moving from evidence to practice. Toronto : John Wiley & Sons 2013;75–92.
8. Lemire N, Souffez K, Laurendeau M-C. Facilitating a knowledge translation process: Knowledge review and facilitation tool. Institut National de Sante Publique du Québec; 2013
9. Lafreniere D, Menuz V, Hurlimann T, Godard B. Knowledge Dissemination Interventions: A Literature Review. *SAGE Open* 2013;3(3): 2158244013498242
10. Bennett G, Jessani N, editors. The Knowledge Translation Toolkit—Bridging the Know-Do Gap: A Resource for Researchers. Ottawa: SAGE Publications and International

- 1  
2 Development Research Centre; 2011.  
3  
4  
5 11. Walter I, Nutley S, Davies H. What works to promote evidence-based practice? A cross-  
6 sector review. *Evidence & Policy: A Journal of Research, Debate and Practice*.  
7 2005;1(3):335–64.  
8  
9  
10 12. Stones C, Gent M. 7 G.R.A.P.H.I.C Principles of Public Health Infographic Design. Leeds:  
11 University of Leeds, Public Health England; 2015.  
12  
13  
14 13. Balkac M, Ergun E. Role of Infographics in Healthcare. *Chin Med J* 2018;131(20):2514–7.  
15  
16 14. Scott H, Fawcner S, Oliver C, Murray A. Why healthcare professionals should know a little  
17 about infographics. *Br J Sports Med* 2016;50(18):1104–5.  
18  
19  
20 15. Krum R. Cool Infographics: Effective Communication with Data Visualization and Design.  
21 John Wiley & Sons; 2013. 372 p.  
22  
23  
24 16. Lankow J, Ritchie J, Crooks R. Infographics: The Power of Visual Storytelling. John Wiley  
25 & Sons; 2012. 345 p.  
26  
27  
28 17. Smiciklas M. The Power of Infographics: Using Pictures to Communicate and Connect With  
29 Your Audiences. 1st Edition. Indianapolis, Ind: Que Publishing; 2012. 224 p.  
30  
31  
32 18. Dunlap JC, Lowenthal PR. Getting graphic about infographics: design lessons learned from  
33 popular infographics. *Journal of Visual Literacy*. 2016;35(1):42–59.  
34  
35  
36 19. Murray IR, Murray AD, Wordie SJ, Oliver CW, Murray AW, Simpson AHRW. Maximising  
37 the impact of your work using infographics. *Bone Joint Res* 2017;6(11):619–20.  
38  
39  
40 20. Martin LJ, Turnquist A, Groot B, Huang SYM, Kok E, Thoma B, et al. Exploring the Role of  
41 Infographics for Summarizing Medical Literature. *Health Professions Education*  
42 2019;5(1):48–57.  
43  
44  
45 21. Downing Bice CF. The relative persuasiveness of health infographics [Doctoral  
46 dissertation]. Colorado State University; 2019.  
47  
48  
49 22. Parrish CP. Exploring visual prevention: Developing infographics as effective Cervical  
50 Cancer prevention for African American women [Doctoral dissertation]. Virginia  
51 Commonwealth University; 2016.  
52  
53  
54  
55 23. Houts PS, Doak CC, Doak LG, Loscalzo MJ. The role of pictures in improving health  
56  
57  
58  
59  
60

- 1  
2 communication: A review of research on attention, comprehension, recall, and adherence.  
3  
4 *Patient Education and Counseling* 2006;61(2):173–90.  
5
- 6 24. Buljan I, Malički M, Wager E, Puljak L, Hren D, Kellie F, et al. No difference in knowledge  
7 obtained from infographic or plain language summary of a Cochrane systematic review:  
8 three randomized controlled trials. *Journal of Clinical Epidemiology* 2018;97:86–94.  
9
- 10 25. Crick K, Hartling L. Preferences of knowledge users for two formats of summarizing results  
11 from systematic reviews: Infographics and critical appraisals. *PLoS One* 2015;10(10):  
12 e0140029.  
13
- 14 26. Occa A, Suggs LS. Communicating breast cancer screening with young women: An  
15 experimental test of didactic and narrative messages using video and infographics. *Journal*  
16 *of Health Communication* 2016;21(1):1–11.  
17
- 18 27. Stones C. Infographics Research: A literature review of empirical studies on attention,  
19 comprehension, recall, adherence and appeal; n.d. Available from:  
20 <https://studylib.net/doc/9968795/infographics-research--a-literature-review-of-empirical->  
21 [S...](#)  
22
- 23 28. Munn Z, Peters MDJ, Stern C, Tufanaru C, McArthur A, Aromataris E. Systematic review  
24 or scoping review? Guidance for authors when choosing between a systematic or scoping  
25 review approach. *BMC Med Res Methodol* 2018;18(1):143.  
26
- 27 29. Grimshaw J. A Guide to Knowledge Synthesis. Canadian Institutes of Health Research;  
28 2010. Available from: <http://www.cihr-irsc.gc.ca/e/41382.html>  
29
- 30 30. Arksey H, O'Malley L. Scoping studies: towards a methodological framework. *International*  
31 *Journal of Social Research Methodology* 2005;8(1):19–32.  
32
- 33 31. Levac D, Colquhoun H, O'Brien KK. Scoping studies: advancing the methodology.  
34 *Implementation Science* 2010;5(1):69.  
35
- 36 32. Peters M, Godfrey C, McInerney P, Munn Z, Trico A, Khalil H. Chapter 11: Scoping  
37 Reviews. In: Aromataris E, Munn Z, eds. *JBIM Manual for Evidence Synthesis*, 2020.  
38 Available from: <https://doi.org/10.46658/JBIMES-20-12>.  
39
- 40 33. Tricco AC, Lillie E, Zarin W, O'Brien KK, Colquhoun H, Levac D, et al. PRISMA Extension  
41 for Scoping Reviews (PRISMA-ScR): Checklist and Explanation. *Annals of Internal*  
42  
43  
44  
45  
46  
47  
48  
49  
50  
51  
52  
53  
54  
55  
56  
57  
58  
59

- 1  
2 *Medicine* 2018;169(7):467–73.  
3  
4  
5 34. Hall A, Furlong B, Pike A, Logan G, Lawrence R, Ryan A, et al. Using theatre as an arts-  
6 based knowledge translation strategy for health-related information: a scoping review  
7 protocol. *BMJ Open* 2019;9(10):e032738.  
8  
9  
10 35. Barac R, Stein S, Bruce B, Barwick M. Scoping review of toolkits as a knowledge translation  
11 strategy in health. *BMC Medical Informatics and Decision Making* 2014;14(1):121.  
12  
13  
14 36. McGowan J, Sampson M, Salzwedel DM, Cogo E, Foerster V, Lefebvre C. PRESS Peer  
15 Review of Electronic Search Strategies: 2015 Guideline Statement. *Journal of Clinical*  
16 *Epidemiology* 2016;75:40–6.  
17  
18  
19  
20 37. Tricco AC, Lillie E, Zarin W, O'Brien K, Colquhoun H, Kastner M, et al. A scoping review on  
21 the conduct and reporting of scoping reviews. *BMC Med Res Methodol* 2016;16(1):15.  
22  
23  
24  
25  
26  
27  
28  
29  
30  
31  
32  
33  
34  
35  
36  
37  
38  
39  
40  
41  
42  
43  
44  
45  
46  
47  
48  
49  
50  
51  
52  
53  
54  
55  
56  
57  
58  
59  
60

## LIST OF FIGURES

---

**Figure 1.** Flowchart detailing identification and selection of studies for inclusion in the review

For peer review only

1  
2  
3  
4  
5  
6  
7  
8  
9  
10  
11  
12  
13  
14  
15  
16  
17  
18  
19  
20  
21  
22  
23  
24  
25  
26  
27  
28  
29  
30  
31  
32  
33  
34  
35  
36  
37  
38  
39  
40  
41  
42  
43  
44  
45  
46  
47  
48  
49  
50  
51  
52  
53  
54  
55  
56  
57  
58  
59  
60

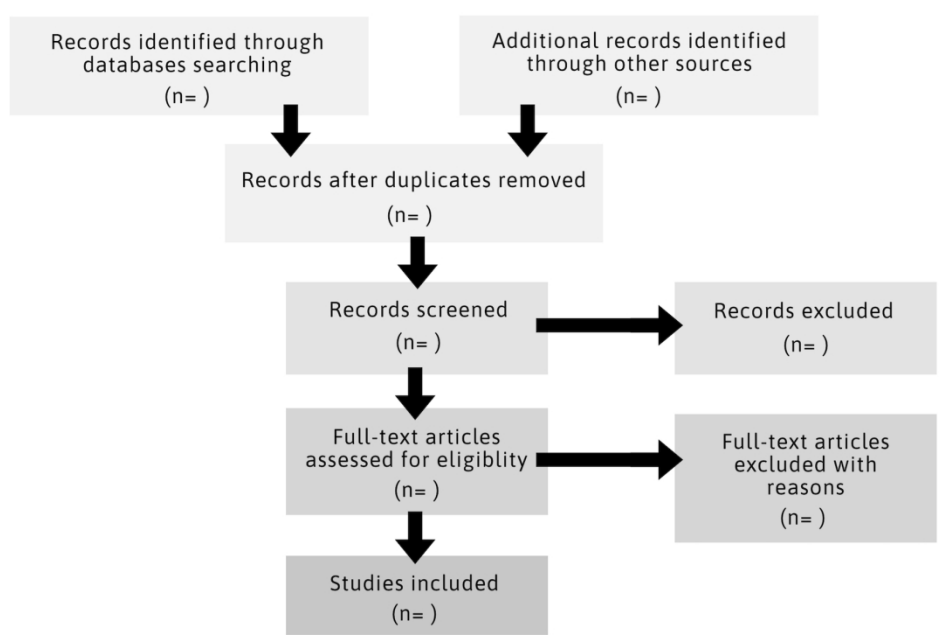

Flowchart detailing identification and selection of studies for inclusion in the review

162x108mm (300 x 300 DPI)

## Appendix 1 | List of terms for the search strategy

| TOOL<br>Terms related to <i>Infographic</i> | PURPOSE<br>Terms related to <i>Knowledge translation</i> |
|---------------------------------------------|----------------------------------------------------------|
| Infographic*                                | Health communicat*                                       |
| Data visuali?ation                          | Information translation                                  |
| Information graphic*                        | Knowledge translation                                    |
| Visual abstract*                            | Knowledge transfer                                       |
| Visual display                              | Health promotion                                         |
| Visual graphic*                             | Health literacy                                          |
| Visual presentation*                        | Health education                                         |
| Visual stor*                                | Science communicat*                                      |
| Datagraphic*                                | Scientific presentation*                                 |
| Graphic* presentation*                      | Research disseminat*                                     |
| Visual* data                                | Research translation                                     |
| Information visuali?ation*                  | Research transfer                                        |
| Graphic* data                               | Information disseminat*                                  |
| Info-graphic*                               | Information communicat*                                  |
|                                             | Research communicat*                                     |
|                                             | Knowledge mobili?ation                                   |
|                                             | Knowledge exchange                                       |
|                                             | Knowledge broker*                                        |
|                                             | Knowledge utili?ation                                    |
|                                             | Knowledge use                                            |
|                                             | Research impact*                                         |
|                                             | Research utili?ation                                     |
|                                             | Evidence use                                             |
|                                             | Evidence-based                                           |
|                                             | Research literature                                      |
|                                             | Medical research                                         |
|                                             | Research evidence                                        |
|                                             | Research data                                            |
|                                             | Scientific knowledge                                     |
|                                             | Health information*                                      |
|                                             | Research result*                                         |
|                                             | Systematic review*                                       |
|                                             | Medical literature                                       |
|                                             | Information retention                                    |
|                                             | Information acquisition                                  |

## Appendix 2 | Search strategy

---

**Database:** Ovid MEDLINE(R) <1946 to present>

**Searched online :** 21/07/2020

**Keywords (title and abstract) :**

**Search results:** 656

((research adj2 literature).ab,ti. OR (medical adj2 research).ab,ti. OR (research adj2 evidence).ab,ti. OR (research adj2 data).ab,ti. OR (scientific adj2 knowledge).ab,ti. OR (health adj2 information\*).ab,ti. OR (research adj2 result\*).ab,ti. OR (systematic adj2 review\*).ab,ti. OR (medical adj2 literature).ab,ti. OR (information adj2 retention).ab,ti. OR (information adj2 translation).ab,ti. OR (knowledge adj2 translation).ab,ti. OR (knowledge adj2 transfer).ab,ti. OR (health adj2 promotion).ab,ti. OR (health adj2 literacy).ab,ti. OR (health adj2 education).ab,ti. OR (health adj2 communicat\*).ab,ti. OR (science adj2 communicat\*).ab,ti. OR (scientific adj2 presentation\*).ab,ti. OR (research adj2 disseminat\*).ab,ti. OR (research adj2 translation).ab,ti. OR evidence-based.ab,ti. OR (evidence adj2 "use").ab,ti. OR (knowledge adj2 mobili?ation).ab,ti. OR (knowledge adj2 exchange).ab,ti. OR (knowledge adj2 broker\*).ab,ti. OR (knowledge adj2 utili?ation).ab,ti. OR (knowledge adj2 "use").ab,ti. OR (research adj2 impact\*).ab,ti. OR (research adj2 utili?ation).ab,ti. OR (research adj2 transfer).ab,ti. OR (information adj2 disseminat\*).ab,ti. OR (information adj2 communicat\*).ab,ti. OR (research adj2 communicat\*).ab,ti. OR (information adj2 acquisition).ab,ti. OR Health Communication/ OR Information Dissemination/ OR Health Promotion/) **AND** ("infographic\*".ab,ti. OR (data adj2 visuali?ation).ab,ti. OR (information adj2 graphic\*).ab,ti. OR (visual adj2 abstract\*).ab,ti. OR "datagraphic\*".ab,ti. OR (visual adj2 display).ab,ti. OR (visual adj2 graphic\*).ab,ti. OR (visual adj2 presentation\*).ab,ti. OR (visual adj2 stor\*).ab,ti. OR (graphic\* adj2 presentation\*).ab,ti. OR (information adj2 visuali?ation\*).ab,ti. OR (visual\* adj2 data).ab,ti. OR (graphic\* adj2 data).ab,ti. OR "info-graphic\*".ab,ti. OR data visualization/)



# BMJ Open

## The use of infographics as a health-related knowledge translation tool: protocol for a scoping review

|                                 |                                                                                                                                                                                                                                                                                                                                                                                                                                                                               |
|---------------------------------|-------------------------------------------------------------------------------------------------------------------------------------------------------------------------------------------------------------------------------------------------------------------------------------------------------------------------------------------------------------------------------------------------------------------------------------------------------------------------------|
| Journal:                        | <i>BMJ Open</i>                                                                                                                                                                                                                                                                                                                                                                                                                                                               |
| Manuscript ID                   | bmjopen-2020-046117.R3                                                                                                                                                                                                                                                                                                                                                                                                                                                        |
| Article Type:                   | Protocol                                                                                                                                                                                                                                                                                                                                                                                                                                                                      |
| Date Submitted by the Author:   | 31-May-2021                                                                                                                                                                                                                                                                                                                                                                                                                                                                   |
| Complete List of Authors:       | Mc Sween-Cadieux, Esther; Université de Sherbrooke, Department of School and Social Adaptation Studies - Faculty of Education<br>Chabot, Catherine; Université de Montréal, Psychology<br>Fillol, Amandine; Université de Montréal, School of Public Health; Institut de recherche pour le développement, CEPED - IRD-Université de Paris - ERL INSERM SAGESUD<br>Saha, Trisha; Université de Montréal, Psychology<br>Dagenais, Christian; Université de Montréal, Psychology |
| <b>Primary Subject Heading</b>: | Public health                                                                                                                                                                                                                                                                                                                                                                                                                                                                 |
| Secondary Subject Heading:      | Medical education and training, Evidence based practice, Communication, Public health                                                                                                                                                                                                                                                                                                                                                                                         |
| Keywords:                       | SOCIAL MEDICINE, PUBLIC HEALTH, MEDICAL EDUCATION & TRAINING                                                                                                                                                                                                                                                                                                                                                                                                                  |
|                                 |                                                                                                                                                                                                                                                                                                                                                                                                                                                                               |

SCHOLARONE™  
Manuscripts

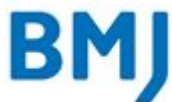

I, the Submitting Author has the right to grant and does grant on behalf of all authors of the Work (as defined in the below author licence), an exclusive licence and/or a non-exclusive licence for contributions from authors who are: i) UK Crown employees; ii) where BMJ has agreed a CC-BY licence shall apply, and/or iii) in accordance with the terms applicable for US Federal Government officers or employees acting as part of their official duties; on a worldwide, perpetual, irrevocable, royalty-free basis to BMJ Publishing Group Ltd ("BMJ") its licensees and where the relevant Journal is co-owned by BMJ to the co-owners of the Journal, to publish the Work in this journal and any other BMJ products and to exploit all rights, as set out in our [licence](#).

The Submitting Author accepts and understands that any supply made under these terms is made by BMJ to the Submitting Author unless you are acting as an employee on behalf of your employer or a postgraduate student of an affiliated institution which is paying any applicable article publishing charge ("APC") for Open Access articles. Where the Submitting Author wishes to make the Work available on an Open Access basis (and intends to pay the relevant APC), the terms of reuse of such Open Access shall be governed by a Creative Commons licence – details of these licences and which [Creative Commons](#) licence will apply to this Work are set out in our licence referred to above.

Other than as permitted in any relevant BMJ Author's Self Archiving Policies, I confirm this Work has not been accepted for publication elsewhere, is not being considered for publication elsewhere and does not duplicate material already published. I confirm all authors consent to publication of this Work and authorise the granting of this licence.

1  
2  
3  
4  
5  
6  
7  
8 **The use of infographics as a health-related knowledge translation tool: protocol for a scoping**  
9 **review**

10  
11  
12  
13 *Esther Mc Sween-Cadieux*<sup>1</sup>

14  
15  
16 *Catherine Chabot*<sup>2</sup>

17  
18  
19 *Amandine Fillo*<sup>3,4</sup>

20  
21  
22 *Trisha Saha*<sup>2</sup>

23  
24  
25  
26 *Christian Dagenais*<sup>2</sup>

27  
28  
29  
30  
31  
32  
33 **Author affiliations**  
34

---

35  
36  
37 <sup>1</sup> Department of School and Social Adaptation Studies, Faculty of Education, Université de  
38 Sherbrooke, Sherbrooke, Quebec, Canada

39  
40  
41  
42 <sup>2</sup> Department of Psychology, Université de Montréal, Montreal, Quebec, Canada

43  
44  
45 <sup>3</sup> School of Public Health, Université de Montréal, Montreal, Quebec, Canada.

46  
47  
48  
49 <sup>4</sup> CEPED, Institute for Research on Sustainable Development, IRD-Université de Paris, ERL  
50 INSERM SAGESUD, Paris, France

51  
52  
53  
54  
55  
56 **Corresponding author**  
57

---

1  
2  
3  
4  
5  
6  
7  
8  
9  
10  
11  
12  
13  
14  
15  
16  
17  
18  
19  
20  
21  
22  
23  
24  
25  
26  
27  
28  
29  
30  
31  
32  
33  
34  
35  
36  
37  
38  
39  
40  
41  
42  
43  
44  
45  
46  
47  
48  
49  
50  
51  
52  
53  
54  
55  
56  
57  
58  
59  
60

Esther Mc Sween-Cadieux, Ph.D  
esther.mc.sween-cadieux@usherbrooke.ca  
ORCID iD - <https://orcid.org/0000-0001-5403-0035>

For peer review only

## ABSTRACT

---

**Introduction.** Efforts to bridge the know–do gap have paved the way for development of the field of knowledge translation (KT). KT aims to understand how evidence use can best be promoted and supported through different activities. For dissemination activities, infographics are gaining in popularity as a promising KT tool to reach multiple health research users (e.g., health practitioners, patients and families, decision-makers). However, to our knowledge, no study has yet mapped the available evidence on this tool using a systematic method. This scoping review will explore the depth and breadth of evidence on infographics use and its effectiveness in improving research uptake (e.g., raising awareness, influencing attitudes, increasing knowledge, informing practice, changing behaviour).

**Methods and analysis.** We will use the scoping review methodological framework first proposed by Arksey and O'Malley (2005), improved by Levac and colleagues (2010), and further refined by the Joanna Briggs Institute (2020). The search will be conducted in MEDLINE, CINAHL, PsycInfo, Social Science Abstracts, LISA, ERIC, Cairn, and Google Scholar. We will also search for relevant literature from the reference lists of the included publications. Two independent reviewers will select the studies. All study designs will be eligible for inclusion, with no date or publication status restrictions. The included studies will have evaluated infographics that disseminate health research evidence and target a non-scientific audience. A data extraction form will be developed and used to extract and chart the data, which will then be synthesized to present a descriptive summary of the results.

**Ethics and dissemination.** Ethics approval is not required. To inform the research and KT communities, various dissemination activities will be developed, including user-friendly KT tools (e.g., webinars, fact sheets, infographics), open-access publication, and presentations at KT events and conferences.

## KEYWORDS

---

1  
2  
3  
4  
5  
6  
7  
8  
9  
10  
11  
12  
13  
14  
15  
16  
17  
18  
19  
20  
21  
22  
23  
24  
25  
26  
27  
28  
29  
30  
31  
32  
33  
34  
35  
36  
37  
38  
39  
40  
41  
42  
43  
44  
45  
46  
47  
48  
49  
50  
51  
52  
53  
54  
55  
56  
57  
58  
59  
60

Infographic, dissemination, knowledge translation, knowledge uptake, effectiveness, scoping review, health research.

For peer review only

## STRENGTHS AND LIMITATIONS OF THIS STUDY

---

→ This scoping review is the first known to systematically uncover and synthesize literature related to infographics use and effectiveness in improving knowledge uptake in health.

→ This protocol adheres to Levac et al.'s methodological guidelines (2010) built on Arksey and O'Malley's original framework (2005), as well as to guidelines from the Joanna Briggs Institute (2020).

→ To reduce bias and errors, this review will include multiple reviewers in all phases of study selection and data extraction.

→ The scope of this review will be limited, in that only literature published in English and French will be included.

→ Following accepted scoping review guidelines, this review will not formally assess the quality of the included studies, limiting our ability to assess the strength of existing evidence.

## BACKGROUND

---

### Knowledge translation

Efforts to mobilize vast amounts of research results and evidence-based information have paved the way for development of the knowledge translation (KT) field (1–3). The Canadian Institutes of Health Research defines KT as “*a dynamic and iterative process that includes synthesis, dissemination, exchange and ethically-sound application of knowledge*” to improve health, health services delivery, and the healthcare system (4). KT science aims to understand how evidence use can best be promoted and supported through different KT activities (5). The choice of activities will vary depending on KT objectives (e.g., raising awareness, improving action through practice change among professionals, influencing political decision-making, mobilizing public action), knowledge users’ needs, implementation context, and the nature and type of knowledge to be shared (6).

In this study, we will focus on dissemination activities that require expertise in plain-language communication and popularization (1,7,8). The primary goal of dissemination activities is to “*make new knowledge understandable and accessible so as to effectively reach the groups of actors concerned*” (p. 30) (8). Studies have shown that passive dissemination of documents poorly suited to the preferences and characteristics of the target audience is often ineffective (5,8,9). Accordingly, the KT field emphasizes the importance of developing dissemination tools that are attractive and adapted to users’ preferences (5). Examples of dissemination tools include summary sheets or infographics, practice guides, newsletters, brochures, leaflets, policy briefs, cartoons, videos, books, reports, plain-language articles, etc. (8,10,11). Thanks to the KT movement, research dissemination is no longer limited to peer-reviewed publications and scientific conferences. More innovative and promising tools are now used for knowledge sharing. This project will specifically focus on one of these tools, infographics (12–14).

### Infographics for knowledge translation



1  
2  
3  
4  
5  
6  
7  
8  
9  
10  
11  
12  
13  
14  
15  
16  
17  
18  
19  
20  
21  
22  
23  
24  
25  
26  
27  
28  
29  
30  
31  
32  
33  
34  
35  
36  
37  
38  
39  
40  
41  
42  
43  
44  
45  
46  
47  
48  
49  
50  
51  
52  
53  
54  
55  
56  
57  
58  
59  
60

Infographics—an abbreviated term for *informational graphics*—have become increasingly popular in today’s digital age (15–17). In fact, however, data visualization is not a new phenomenon; maps and illustrations, for instance, have been around for many centuries (18). While no single definition has gained wide acceptance, an infographic is often understood as an eye-catching one-page document that uses striking and engaging visuals to communicate complex evidence-based information in an attractive and easily understandable way (17,19,20). An infographic “*uses visual cues, illustrations and large typography to display facts in a long, vertical orientation, and are distributed through print media, embedded into websites, and shared on social media*” (p. 2) (21). It usually presents information in a logical manner to tell a story (13–15,22).

Infographics are ubiquitous and used by many different industries and sectors: business, environment, food, finance, politics, and the healthcare sector, among others (14). Their purpose is to capture users’ attention, help them better understand the information presented, increase their ability to retain and recall the message, and encourage them to act in accordance with the information (23). Infographics are thus gaining ground as a promising research or health information dissemination tool to reach multiple potential knowledge users, such as health practitioners, patients and families, decision-makers, and community members. Several research community initiatives have been aimed at producing and distributing infographics in scientific journals or on social media (e.g., Twitter, Facebook, LinkedIn, Pinterest, Instagram). Moreover, with the recent emergence of user-friendly software for producing infographics, they have become the go-to tool in many contexts, targeting different audiences and using a variety of formats and designs. Thus, research on infographics is essential to better understand their real effectiveness in improving knowledge uptake and to highlight best practices for designing, producing, and sharing them. In fact, many empirical studies have explored the use of infographics as an intervention tool for disseminating research results or evidence-based information (20,24–26).

## Purpose

To our knowledge, no knowledge synthesis has been conducted using a methodology that is both systematic and inclusive of all study designs and evidence sources to map the

1  
2 available evidence on the effectiveness of infographics in supporting dissemination. Although  
3 a review of literature was produced related to this topic (27), our review differs in that we use a  
4 systematic methodology specific to scoping reviews, include all study designs, and add  
5 references published since 2015, to capture the important number of new studies using  
6 infographics in recent years. Our overarching goal is to explore the depth and breadth of  
7 evidence about the use and effectiveness of infographics as a KT intervention tool to improve  
8 knowledge uptake in health (e.g., raising awareness, influencing attitudes, increasing  
9 knowledge, informing practice, changing behaviour). To produce an evidence synthesis, we will  
10 conduct a scoping review. This approach is recommended when the purpose is, for example,  
11 to clarify key concepts and definitions in the literature, to identify key characteristics or factors  
12 related to a concept, or to examine how research is conducted on a certain topic (28). According  
13 to the Canadian Institutes of Health Research, a scoping review is “*undertaken when feasibility*  
14 *is a concern—either because the potentially relevant literature is thought to be especially vast*  
15 *and diverse (varying by method, theoretical orientation or discipline) or there is a suspicion that*  
16 *not enough literature exists”* (p. 34) (29). As such, a scoping review is useful to identify  
17 knowledge gaps that might be addressed in future research.  
18  
19  
20  
21  
22  
23  
24  
25  
26  
27  
28  
29  
30

## 31 METHODS AND ANALYSIS

---

32  
33  
34  
35  
36 To guide our methodology, we will primarily use the scoping review methodological  
37 framework first proposed by Arksey and O’Malley (2005) (30), improved by Levac, Colquhoun  
38 and O’Brien (2010) (31), and further refined by the Joanna Briggs Institute (2020) (32). A  
39 scoping review includes six key phases: 1) identifying the research questions; 2) identifying  
40 relevant studies; 3) selecting studies; 4) charting the data; 5) collating, summarizing, and  
41 reporting the results; and 6) consulting with relevant experts. This protocol is congruent with  
42 the PRISMA-ScR checklist (*Preferred Reporting Items for Systematic reviews and Meta-*  
43 *Analyses: Extension for Scoping Reviews*), as will be the reporting of the scoping review (33).  
44 This scoping review protocol is inspired by and based on previous scoping reviews on similar  
45 KT activities and tools (34,35).  
46  
47  
48  
49  
50  
51  
52  
53  
54

### 55 Stage 1 | Identifying the research questions

The first stage is to identify research questions related to the purpose of this study. As stated earlier, this scoping review is aimed at determining the scope of evidence on infographics use as a KT intervention tool to disseminate research results or evidence-based information (in health-related sectors) to those who can benefit. Table 1 describes the core elements of the scoping review based on the Population-Concept-Context (PCC) framework (32).

| <b>Table 1   PCC framework to illustrate the scope and focus of the review</b> |                                                                                                                                                                                                               |
|--------------------------------------------------------------------------------|---------------------------------------------------------------------------------------------------------------------------------------------------------------------------------------------------------------|
| Population                                                                     | - Potential knowledge users (non-scientific audience), such as health professionals, decision-makers, patients and families, and communities.                                                                 |
| Concept                                                                        | - An infographic or any shareable tool that uses striking and engaging visuals to communicate complex evidence-based information in a user-friendly way.                                                      |
| Context                                                                        | - The use, in health-related sectors, of an infographic intervention to promote and improve knowledge use (e.g., raise awareness, influence attitudes, increase knowledge, inform practice, change behaviour) |

We formulated five specific research questions to guide this review. Because the scoping review process can be iterative, we will adopt a reflexive approach and will revise research questions, if needed, as we become more familiar with the body of evidence.

### **Question 1 | What is an infographic?**

Given the recent popularity of infographics for KT, and to clarify the nature of this tool, we want to know more about the terms and definitions put forward in the literature to characterize infographics. We will also document the theories or conceptual frameworks most used to study infographics (e.g., *dual-coding theory*, *cognitive load theory*, *theory of planned behavior*, etc.).

### **Question 2 | Why are infographics used, for whom, and what do they contain?**

Next, we will identify the main characteristics of the studied infographics, such as their goals (e.g., to raise awareness, influence attitudes, increase knowledge, inform practice, change behaviour), the nature of their content in relation to the information presented, their

1  
2 target audiences, the process used to develop the tool, as well as the visual appearance and  
3 format of the infographics. We will use the basic principles of public health infographic design  
4 (e.g., coherence, colours, alignment, visual hierarchy, use of charts, imagery, headings) as a  
5 general framework to extract data related to the visual quality of the infographics in the selected  
6 studies (12).  
7  
8  
9  
10

### 11 12 **Question 3 | How is research conducted in the field of health infographics?**

13  
14  
15  
16 We aim to produce a portrait of how empirical studies on infographics are designed.  
17 From each of the selected studies, we will extract and analyze data related to its research  
18 design (e.g., objectives, methods, comparator(s), study procedure), study population, sample  
19 size, indicators (outcomes of interest), measurement tools, and types of analyses. We will also  
20 document how the infographics were delivered in the studies (e.g., online versus printed  
21 infographic, targeted mail, social media).  
22  
23  
24  
25  
26  
27

### 28 **Question 4 | How effective have infographics been in achieving their goals?**

29  
30  
31  
32 We will document the available evidence on the effectiveness of infographics as a KT  
33 intervention in relation to the objectives of the infographics used. The potential of this tool will  
34 be discernable to the extent that the studies will have demonstrated their infographics'  
35 effectiveness in relation to outcomes of interest. Finally, we will document the authors'  
36 conclusions regarding perceived barriers and enablers of infographics effectiveness.  
37  
38  
39  
40  
41

### 42 **Question 5 | What are the knowledge gaps and future research needs?**

43  
44  
45  
46 With this last question, we aim to uncover persisting knowledge gaps. To do this, we will  
47 describe the main limitations of the selected studies, with a view to discerning any questions  
48 that remain unanswered. We hope to make recommendations on needs for research to further  
49 advance knowledge.  
50  
51  
52

## 53 54 **Stage 2 | Identifying relevant studies**

## Search strategy

The search strategy was developed by the first author (EMC) with a senior information specialist. It was then circulated to the research team and further refined. Search terms will include keywords and terms related to: (1) *knowledge translation* (e.g., research dissemination, health communication, knowledge transfer) and (2) *infographic* (e.g., informational graphic, data visualization, visual graphic) (see Appendix 1). To capture as many relevant publications as possible, the list of terms will be iteratively revised after searching the databases. The search strategy will not be limited by study design, year of publication, or publication status. Searches will be limited to English and French language publications, due to resource constraints. The search strategy for the MEDLINE database is presented in Appendix 2. It will be adapted for the other databases and will also be available from the corresponding author upon request. The search strategy will be validated using the *Peer Review of Electronic Search Strategies* (PRESS) checklist (36).

## Information sources

A systematic search of the published and grey literature will be conducted to identify relevant publications. We will search the following electronic databases from inception onwards: MEDLINE, Cumulative Index to Nursing and Allied Health Literature (CINAHL), PsycInfo, Social Science Abstracts, Library and Information Science Abstracts (LISA), Education Resources Information Center (ERIC), and Cairn. These databases were chosen to capture the most comprehensive body of literature possible. The grey literature (e.g., reports, conference proceedings, theses, working papers, evaluations) will be searched using Google Scholar and Google Web search engines. Reference lists of key publications will also be hand-searched by the review team to capture any paper missed in the electronic searches. The search in the databases will be conducted by our information specialist. Results will be imported into *Covidence*, a systematic review software program, and duplicate citations will be removed before the study selection process.

## Stage 3 | Selecting studies

1  
2  
3  
4  
5  
6  
7  
8  
9  
10  
11  
12  
13  
14  
15  
16  
17  
18  
19  
20  
21  
22  
23  
24  
25  
26  
27  
28  
29  
30  
31  
32  
33  
34  
35  
36  
37  
38  
39  
40  
41  
42  
43  
44  
45  
46  
47  
48  
49  
50  
51  
52  
53  
54  
55  
56  
57  
58  
59  
60

The study selection process will consist of two stages: 1) title and abstract screening, and 2) full-text screening by two reviewers, independently. We will use *Covidence* to manage these two stages of selection. Before beginning the screening, the eligibility criteria (inclusion and exclusion) will be pilot tested on a random sample of publications and modified if low inter-reviewer agreement is observed (e.g., a kappa statistic below 60%). If the level of agreement is acceptable, the two reviewers will independently screen the titles and abstracts of all publications retrieved to determine whether they are eligible for full review. The reviewers will meet regularly to discuss uncertainties related to eligibility criteria and to resolve differences in study selection, with a view to ensuring inter-reviewer reliability and reaching consensus. Publications identified as potentially relevant to this scoping review will be retrieved in full text. After completion of the first stage and prior to the full-text review, the two reviewers will meet to revisit the scope of the review and to refine or extend inclusion and exclusion criteria, if necessary. They will also meet regularly during the second stage to discuss and resolve differences. In cases of unresolved decisions related to the inclusion of a study at any stage, a third researcher will adjudicate. A flowchart will be produced using the PRISMA template to report on the selection process (Figure 1).

[Insert Figure 1]

### Flowchart detailing identification and selection of studies for inclusion in the review

#### ***Inclusion criteria***

The inclusion criteria are based on the PCC framework (see Table 1). As such, we will include studies that:

- empirically evaluate an infographic tool (i.e., one that includes textual and visual content);
- disseminate research results or other health-related information;
- target a non-scientific audience to improve knowledge use.

All study designs will be eligible for inclusion, with no publication date or status restrictions. Relevant publications that do not meet these inclusion criteria (e.g., theoretical paper on information design principles, visual literacy) will be held in a separate folder; if appropriate, they will be used to support data analysis and interpretation.

### ***Exclusion criteria***

We will exclude studies that:

- do not focus on health-related issues;
- target children, such as primary school students;
- concern one type of graph or charts (e.g., bar charts, forest plots, 3D graphs);
- only address interactive data visualization tools (e.g., video, apps, websites);
- use health data (e.g., personal data contained in electronic health records);
- use infographics as a form of therapy or clinical intervention;
- focus on developing data visualization skills;
- do not make the evaluated infographic tool available;
- are published in languages other than French and English.

### **Stage 4 | Charting the data**

After completing the study selection process using Covidence, we will develop a data extraction form using Microsoft Excel® to capture the data of interest from the selected studies. Two reviewers will pilot test the form on a random sample of the included studies (10%). They will then meet with the research team to discuss uncertainties and additional potentially relevant information to be included in the form. Data from the remaining studies will be abstracted by one reviewer and verified by a second reviewer to ensure correctness and completeness. The data extraction form will be iteratively revised as necessary, to ensure its rigour and ability to capture all relevant data to answer the review questions. Table 2 presents the data to be extracted.

| <b>Table 2   Preliminary data extraction form</b> |               |
|---------------------------------------------------|---------------|
| <b>General information</b>                        | - Study title |



|    |                                                                |                                                                                                                                                                                                                                                                                                                                                               |
|----|----------------------------------------------------------------|---------------------------------------------------------------------------------------------------------------------------------------------------------------------------------------------------------------------------------------------------------------------------------------------------------------------------------------------------------------|
|    |                                                                | <ul style="list-style-type: none"> <li>- Author(s)</li> <li>- Year of publication</li> <li>- Country of origin</li> <li>- Topic of the infographic</li> <li>- Type of article and journal</li> </ul>                                                                                                                                                          |
| Q1 | What is an infographic?                                        | <ul style="list-style-type: none"> <li>- Terms used and concept definition</li> <li>- Theory or conceptual framework used</li> </ul>                                                                                                                                                                                                                          |
| Q2 | Why are infographics used, for whom, and what do they contain? | <ul style="list-style-type: none"> <li>- Objectives of the infographic used</li> <li>- Infographic content</li> <li>- Target audience characteristics</li> <li>- Visual aspect and format</li> <li>- Development process</li> </ul>                                                                                                                           |
| Q3 | How is research conducted in the field of health infographics? | <ul style="list-style-type: none"> <li>- Study purpose (research questions/hypothesis)</li> <li>- Research design and comparator (if experimental study)</li> <li>- Study procedure and delivery method</li> <li>- Population and sample size</li> <li>- Indicators (outcomes of interest) and measurement tools</li> <li>- Types of data analysis</li> </ul> |
| Q4 | How effective have infographics been in achieving their goals? | <ul style="list-style-type: none"> <li>- Main quantitative results / outcomes</li> <li>- Main qualitative results / outcomes</li> <li>- Perceived barriers and enablers</li> </ul>                                                                                                                                                                            |
| Q5 | What are the knowledge gaps and future research needs?         | <ul style="list-style-type: none"> <li>- Study limitations</li> <li>- Future research needs</li> </ul>                                                                                                                                                                                                                                                        |



1  
2  
3  
4 Given that the aim of a scoping review is primarily to identify gaps in the evidence base,  
5 and consistent with guidance on conducting scoping reviews, we will not conduct a critical  
6 appraisal of the selected studies.  
7  
8  
9

## 10 11 12 **Stage 5 | Collating, summarizing, and reporting the results** 13 14 15

16 The synthesis stage of this review will involve producing a descriptive summary and  
17 thematic analysis of the extracted data (31). To ensure rigour, two reviewers will conduct the  
18 analysis with input from collaborators during the process. A descriptive summary of the  
19 publications' characteristics (year of publication, country of origin, health topic, type of article)  
20 will be presented using frequencies and percentages. We will also prepare descriptive summary  
21 tables of all data extracted from included studies that are aligned with our research questions  
22 (based on the research question variables presented in Table 2). These tables will map key  
23 findings regarding infographic definitions and theories used, characteristics of the studied  
24 infographics (goals, content, target audience, visual and format, development process),  
25 characteristics of the research designs, outcomes of interest used to measure the infographic's  
26 effectiveness, main results, author conclusions, and future research needs. We will prepare a  
27 qualitative descriptive summary to accompany the tabulated results to describe how they relate  
28 to our research questions. Finally, if the extracted data allow it, a more in-depth qualitative  
29 analysis will be conducted to discuss or nuance the evidence of effectiveness in light of potential  
30 barriers and enablers identified by the authors. We will use the PRISMA Extension for Scoping  
31 Reviews to guide the final reporting of our results.  
32  
33  
34  
35  
36  
37  
38  
39  
40  
41  
42  
43  
44  
45

## 46 **Stage 6 | Consultation** 47 48 49

50 While consultation is optional, it can be a relevant and useful stage of a scoping review  
51 process, adding methodological rigour and enhancing the validity and usefulness of the review  
52 results (31,37). Given that all authors of this protocol are members of a multidisciplinary  
53 research team on KT in Canada (RENARD team), we will mobilize our network. We will develop  
54 a consultation panel made up of KT researchers, including graduate students and practitioners.  
55  
56  
57  
58  
59  
60

1  
2 All RENARD members have expertise in the KT research field and/or in developing and  
3 implementing KT activities to improve knowledge uptake. Input from these informants will be  
4 essential to: 1) provide additional references to include in the review; 2) contribute valuable  
5 insights into our preliminary results; and 3) develop, contextualize, and validate  
6 recommendations based on the results of our scoping review (e.g., research priorities, criteria  
7 for developing effective infographics). The consultation exercise will consist of two focus groups  
8 (one on preliminary results and one at the final stage) with approximately 10 experts per group.  
9  
10  
11  
12  
13  
14  
15

### 16 **Patient and public involvement**

17 Patients and members of the public were not involved in the conception and design of this  
18 protocol.  
19  
20  
21  
22

## 23 **ETHICS AND DISSEMINATION**

---

24  
25  
26  
27 To our knowledge, this will be the first comprehensive and systematic scoping review on  
28 the use and effectiveness of infographics as a KT intervention tool to improve knowledge uptake  
29 in the health sector. This review will contribute to both dissemination science and practice. In  
30 summary, we will identify gaps in the literature as well as research areas that require systematic  
31 review or primary research. This scoping review will be helpful not only to improve research  
32 carried out in this field (e.g., recommendations for study designs, indicators, measurement  
33 tools), but also to offer preliminary guidelines to those planning to use infographics for KT. This  
34 review will enable us to describe what an infographic is and what form(s) this tool can take  
35 (offering a common terminology and definition in the KT field), to identify in which contexts  
36 infographics can be effective and for what purposes, and to identify key principles to consider  
37 when developing an infographic for KT.  
38  
39  
40  
41  
42  
43  
44  
45  
46  
47

48 The present study is exempt from ethics approval because it involves no patient or  
49 personal data collection. After completion of the search strategy and data extraction process in  
50 the spring, the scoping review results are expected to be ready by August 2021. We will then  
51 develop a KT plan to disseminate the results. The main objectives will be to inform the research  
52 and KT communities on the state of knowledge on this increasingly popular tool and to raise  
53 awareness of its potential usefulness (or non-usefulness) in certain contexts, depending on the  
54  
55  
56  
57  
58  
59  
60

1  
2 conclusions of our review. To achieve these objectives, we will use a combination of user-  
3 friendly KT activities such as webinars, fact sheets, summaries, and infographics. They will be  
4 widely disseminated via our research team's website ([www.equiperenard.org](http://www.equiperenard.org)), newsletters, and  
5 social media. Results will also be published in an open-access peer-reviewed international  
6 journal and presented in relevant KT conferences or events (e.g., Canadian Knowledge  
7 Mobilization Forum).  
8  
9  
10  
11  
12  
13

14 **Acknowledgements.** We wish to thank Julie Desnoyers, the information specialist affiliated with  
15 the RENARD research team on knowledge translation at Université de Montréal, for her  
16 assistance in adapting the search strategy used in this scoping review. We also want to thank  
17 Équipe RENARD - Fonds de recherche du Québec–Société et Culture (FRQ-SC) and Donna  
18 Riley, for editing services.  
19  
20  
21  
22  
23  
24

25 **Contributors.** EMC, CC, AF, TS, and CD conceptualized the study. EMC drafted the protocol.  
26 CC, AF, TS, and CD critically revised the manuscript. EMC and TS wrote the final draft  
27 manuscript, and all the authors approved it.  
28  
29  
30  
31

32 **Funding.** The authors have not declared a specific grant for this research from any funding  
33 agency in the public, commercial, or not-for-profit sectors.  
34  
35  
36

37 **Competing interests.** None declared.  
38  
39

40 **Patient consent for publication.** Not required.  
41  
42  
43

44 **Provenance and peer review.** Not commissioned, externally peer reviewed.  
45  
46

47 **Word Count.** 3393 words (excluding abstract, references, and appendices)  
48  
49  
50  
51  
52  
53  
54  
55  
56  
57  
58  
59  
60

## REFERENCES

---

1. Graham ID, Logan J, Harrison MB, et al. Lost in knowledge translation: time for a map? *J Contin Educ Health Prof* 2006;26(1):13–24. doi: 10.1002/chp.47
2. McKibbin KA, Lokker C, Wilczynski NL, et al. A cross-sectional study of the number and frequency of terms used to refer to knowledge translation in a body of health literature in 2006: a Tower of Babel? *Implement Sci* 2010;5(1):16. doi: 10.1186/1748-5908-5-16
3. Straus S, Tetroe J, Graham ID, editors. *Knowledge Translation in Health Care: Moving from Evidence to Practice*, 2<sup>nd</sup> ed. Hoboken, NJ: Wiley Blackwell; 2013.
4. Canadian Institutes of Health Research (CIHR). Knowledge translation: definition. Available from: <https://cihr-irsc.gc.ca/e/29529.html> [Accessed January 2021]
5. Langer L, Tripney J, Gough D. *The Science of Using Science: Researching the Use of Research Evidence in Decision-Making*. London: EPPI-Centre, Social Science Research Unit, UCL Institute of Education, University College London; 2016.
6. Graham ID, Tetroe JM. Getting evidence into policy and practice: perspective of a health research funder. *J Can Acad Child Adolesc Psychiatry* 2009;18(1):46–50.
7. Graham ID, Tetroe J, Gagnon M. Knowledge dissemination: end of grant knowledge translation. In: Straus, SE, Tetroe, J, Graham, ID, eds. *Knowledge Translation in Health Care: Moving from Evidence to Practice*, 2<sup>nd</sup> ed. Toronto: John Wiley & Sons; 2013:75–92.
8. Lemire N, Souffez K, Laurendeau M-C. *Facilitating a Knowledge Translation Process: Knowledge Review and Facilitation Tool*. Montreal, QC: Institut national de santé publique du Québec; 2013.
9. Lafreniere D, Menuz V, Hurlimann T, et al. Knowledge dissemination interventions: a literature review. *SAGE Open* 2013;3(3). doi: 10.1177/2158244013498242
10. Bennett G, Jessani N, editors. *The Knowledge Translation Toolkit—Bridging the Know-Do Gap: A Resource for Researchers*. Ottawa: SAGE Publications and International Development Research Centre; 2011.
11. Walter I, Nutley S, Davies H. What works to promote evidence-based practice? A cross-

- 1  
2 sector review. *Evid Policy* 2005;1(3):335–64. doi: 10.1332/1744264054851612  
3  
4  
5 12. Stones C, Gent M. *7 G.R.A.P.H.I.C Principles of Public Health Infographic Design*. Leeds,  
6 UK: University of Leeds, Public Health England; 2015.  
7  
8  
9 13. Balkac M, Ergun E. Role of infographics in healthcare. *Chin Med J* 2018;131(20):2514–7.  
10 doi: 10.4103/0366-6999.243569  
11  
12  
13 14. Scott H, Fawcner S, Oliver C, et al. Why healthcare professionals should know a little about  
14 infographics. *Br J Sports Med* 2016;50(18):1104–5. doi: 10.1136/bjsports-2016-096133  
15  
16  
17 15. Krum R. *Cool Infographics: Effective Communication with Data Visualization and Design*.  
18 Indianapolis, IN: John Wiley & Sons; 2013.  
19  
20  
21 16. Lankow J, Ritchie J, Crooks R. *Infographics: The Power of Visual Storytelling*. Hoboken,  
22 NJ: John Wiley & Sons; 2012.  
23  
24  
25 17. Smiciklas M. *The Power of Infographics: Using Pictures to Communicate and Connect With*  
26 *Your Audiences*. Indianapolis, IN: Que Publishing; 2012.  
27  
28  
29 18. Dunlap JC, Lowenthal PR. Getting graphic about infographics: design lessons learned from  
30 popular infographics. *J Vis Lit* 2016;35(1):42–59. doi: 10.1080/1051144X.2016.1205832  
31  
32  
33 19. Murray IR, Murray AD, Wordie SJ, et al. Maximising the impact of your work using  
34 infographics. *Bone Joint Res* 2017;6(11):619–20. doi: 10.1302/2046-3758.611.BJR-2017-  
35 0313  
36  
37  
38 20. Martin LJ, Turnquist A, Groot B, et al. Exploring the role of infographics for summarizing  
39 medical literature. *Health Prof Educ* 2019;5(1):48–57. doi: 10.1016/j.hpe.2018.03.005  
40  
41  
42 21. Downing Bice CF. The relative persuasiveness of health infographics [Doctoral  
43 dissertation]. Colorado State University; 2019.  
44  
45  
46 22. Parrish CP. Exploring visual prevention: developing infographics as effective cervical  
47 cancer prevention for African American women [Doctoral dissertation]. Virginia  
48 Commonwealth University; 2016.  
49  
50  
51 23. Houts PS, Doak CC, Doak LG, et al. The role of pictures in improving health  
52 communication: a review of research on attention, comprehension, recall, and adherence.  
53 *Patient Educ Couns* 2006;61(2):173–90. doi: 10.1016/j.pec.2005.05.004  
54  
55  
56  
57  
58  
59

- 1
  - 2
  - 3
  - 4
  - 5
  - 6
  - 7
  - 8
  - 9
  - 10
  - 11
  - 12
  - 13
  - 14
  - 15
  - 16
  - 17
  - 18
  - 19
  - 20
  - 21
  - 22
  - 23
  - 24
  - 25
  - 26
  - 27
  - 28
  - 29
  - 30
  - 31
  - 32
  - 33
  - 34
  - 35
  - 36
  - 37
  - 38
  - 39
  - 40
  - 41
  - 42
  - 43
  - 44
  - 45
  - 46
  - 47
  - 48
  - 49
  - 50
  - 51
  - 52
  - 53
  - 54
  - 55
  - 56
  - 57
  - 58
  - 59
  - 60
24. Buljan I, Malički M, Wager E, et al. No difference in knowledge obtained from infographic or plain language summary of a Cochrane systematic review: three randomized controlled trials. *J Clin Epidemiol* 2018;97:86–94. doi: 10.1016/j.jclinepi.2017.12.003
25. Crick K, Hartling L. Preferences of knowledge users for two formats of summarizing results from systematic reviews: infographics and critical appraisals. *PLoS One* 2015;10(10): e0140029. doi: 10.1371/journal.pone.0140029
26. Occa A, Suggs LS. Communicating breast cancer screening with young women: an experimental test of didactic and narrative messages using video and infographics. *J Health Commun* 2016;21(1):1–11. doi: 10.1080/10810730.2015.1018611
27. Stones C. Infographics research: A literature review of empirical studies on attention, comprehension, recall, adherence and appeal; n.d. Available from: <https://visualisinghealth.com/the-evidence-base/>
28. Munn Z, Peters MDJ, Stern C, et al. Systematic review or scoping review? Guidance for authors when choosing between a systematic or scoping review approach. *BMC Med Res Methodol* 2018;18(1):143. doi: 10.1186/s12874-018-0611-x
29. Grimshaw J. *A Guide to Knowledge Synthesis*. Ottawa: Canadian Institutes of Health Research; 2010. Available from: <http://www.cihr-irsc.gc.ca/e/41382.html>
30. Arksey H, O'Malley L. Scoping studies: towards a methodological framework. *Int J Soc Res Methodol* 2005;8(1):19–32. doi: 10.1080/1364557032000119616
31. Levac D, Colquhoun H, O'Brien KK. Scoping studies: advancing the methodology. *Implement Sci* 2010;5(1):69. doi: 10.1186/1748-5908-5-69
32. Peters M, Godfrey C, McInerney P, et al. Chapter 11: Scoping Reviews. In: Aromataris E, Munn Z, eds. *JBI Manual for Evidence Synthesis*. Adelaide, AU: Joanna Briggs Institute; 2020. Available from: <https://doi.org/10.46658/JBIMES-20-12>.
33. Tricco AC, Lillie E, Zarin W, et al. PRISMA Extension for Scoping Reviews (PRISMA-ScR): checklist and explanation. *Ann Intern Med* 2018;169(7):467–73. doi: 10.7326/M18-0850
34. Hall A, Furlong B, Pike A, et al. Using theatre as an arts-based knowledge translation strategy for health-related information: a scoping review protocol. *BMJ Open*

1  
2 2019;9(10):e032738.doi: 10.1136/bmjopen-2019-032738  
3

- 4  
5 35. Barac R, Stein S, Bruce B, et al. Scoping review of toolkits as a knowledge translation  
6 strategy in health. *BMC Med Inform Decis Mak* 2014;14(1):121. doi: 10.1186/s12911-014-  
7 0121-7  
8  
9  
10 36. McGowan J, Sampson M, Salzwedel DM, et al. PRESS Peer Review of Electronic Search  
11 Strategies: 2015 Guideline Statement. *J Clin Epidemiol* 2016;75:40–6. doi:  
12 10.1016/j.jclinepi.2016.01.021  
13  
14  
15 37. Tricco AC, Lillie E, Zarin W, et al. A scoping review on the conduct and reporting of scoping  
16 reviews. *BMC Med Res Methodol* 2016;16(1):15. doi: 10.1186/s12874-016-0116-4  
17  
18  
19  
20  
21  
22  
23  
24  
25  
26  
27  
28  
29  
30  
31  
32  
33  
34  
35  
36  
37  
38  
39  
40  
41  
42  
43  
44  
45  
46  
47  
48  
49  
50  
51  
52  
53  
54  
55  
56  
57  
58  
59  
60

1  
2  
3  
4  
5  
6  
7  
8  
9  
10  
11  
12  
13  
14  
15  
16  
17  
18  
19  
20  
21  
22  
23  
24  
25  
26  
27  
28  
29  
30  
31  
32  
33  
34  
35  
36  
37  
38  
39  
40  
41  
42  
43  
44  
45  
46  
47  
48  
49  
50  
51  
52  
53  
54  
55  
56  
57  
58  
59  
60

## LIST OF FIGURES

---

**Figure 1.** Flowchart detailing identification and selection of studies for inclusion in the review

For peer review only



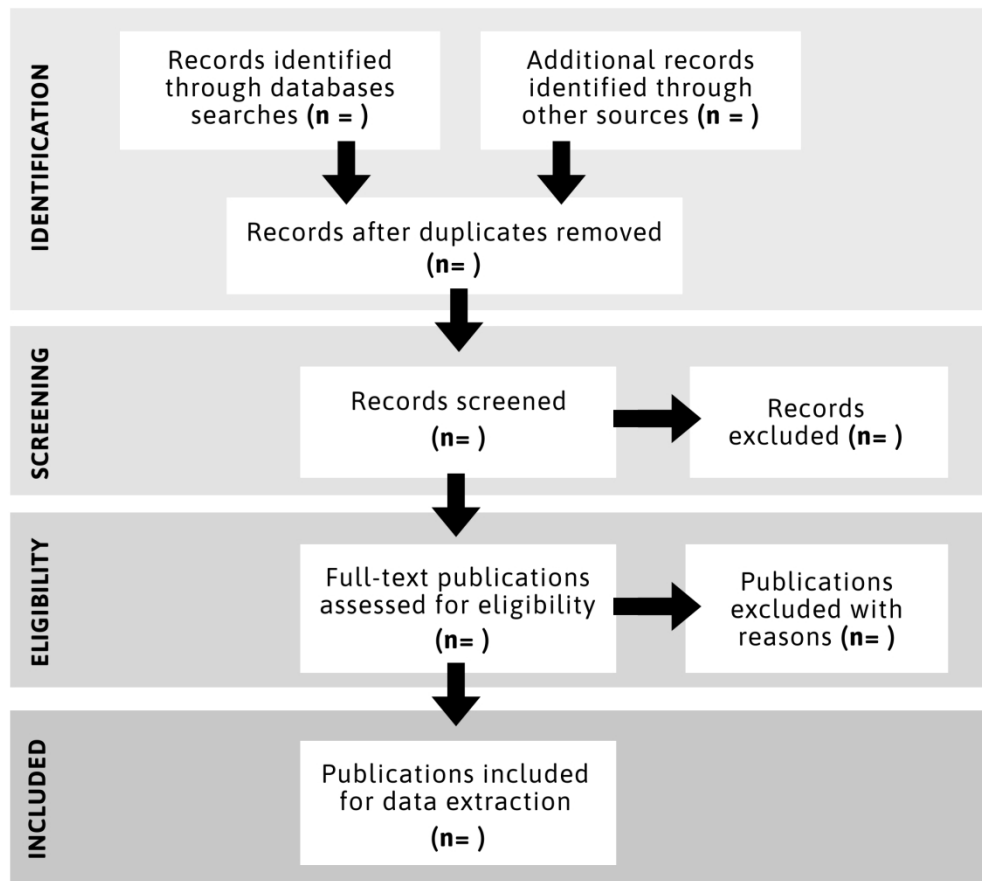

Flowchart detailing identification and selection of studies for inclusion in the review

733x654mm (72 x 72 DPI)

## Appendix 1 | List of terms for the search strategy

| TOOL<br>Terms related to <i>Infographic</i> | PURPOSE<br>Terms related to <i>Knowledge translation</i> |
|---------------------------------------------|----------------------------------------------------------|
| Infographic*                                | Health communicat*                                       |
| Data visuali?ation                          | Information translation                                  |
| Information graphic*                        | Knowledge translation                                    |
| Visual abstract*                            | Knowledge transfer                                       |
| Visual display                              | Health promotion                                         |
| Visual graphic*                             | Health literacy                                          |
| Visual presentation*                        | Health education                                         |
| Visual stor*                                | Science communicat*                                      |
| Datagraphic*                                | Scientific presentation*                                 |
| Graphic* presentation*                      | Research disseminat*                                     |
| Visual* data                                | Research translation                                     |
| Information visuali?ation*                  | Research transfer                                        |
| Graphic* data                               | Information disseminat*                                  |
| Info-graphic*                               | Information communicat*                                  |
|                                             | Research communicat*                                     |
|                                             | Knowledge mobili?ation                                   |
|                                             | Knowledge exchange                                       |
|                                             | Knowledge broker*                                        |
|                                             | Knowledge utili?ation                                    |
|                                             | Knowledge use                                            |
|                                             | Research impact*                                         |
|                                             | Research utili?ation                                     |
|                                             | Evidence use                                             |
|                                             | Evidence-based                                           |
|                                             | Research literature                                      |
|                                             | Medical research                                         |
|                                             | Research evidence                                        |
|                                             | Research data                                            |
|                                             | Scientific knowledge                                     |
|                                             | Health information*                                      |
|                                             | Research result*                                         |
|                                             | Systematic review*                                       |
|                                             | Medical literature                                       |
|                                             | Information retention                                    |
|                                             | Information acquisition                                  |

## Appendix 2 | Search strategy

---

**Database:** Ovid MEDLINE(R) <1946 to present>

**Searched online :** 21/07/2020

**Keywords (title and abstract) :**

**Search results:** 656

((research adj2 literature).ab,ti. OR (medical adj2 research).ab,ti. OR (research adj2 evidence).ab,ti. OR (research adj2 data).ab,ti. OR (scientific adj2 knowledge).ab,ti. OR (health adj2 information\*).ab,ti. OR (research adj2 result\*).ab,ti. OR (systematic adj2 review\*).ab,ti. OR (medical adj2 literature).ab,ti. OR (information adj2 retention).ab,ti. OR (information adj2 translation).ab,ti. OR (knowledge adj2 translation).ab,ti. OR (knowledge adj2 transfer).ab,ti. OR (health adj2 promotion).ab,ti. OR (health adj2 literacy).ab,ti. OR (health adj2 education).ab,ti. OR (health adj2 communicat\*).ab,ti. OR (science adj2 communicat\*).ab,ti. OR (scientific adj2 presentation\*).ab,ti. OR (research adj2 disseminat\*).ab,ti. OR (research adj2 translation).ab,ti. OR evidence-based.ab,ti. OR (evidence adj2 "use").ab,ti. OR (knowledge adj2 mobili?ation).ab,ti. OR (knowledge adj2 exchange).ab,ti. OR (knowledge adj2 broker\*).ab,ti. OR (knowledge adj2 utili?ation).ab,ti. OR (knowledge adj2 "use").ab,ti. OR (research adj2 impact\*).ab,ti. OR (research adj2 utili?ation).ab,ti. OR (research adj2 transfer).ab,ti. OR (information adj2 disseminat\*).ab,ti. OR (information adj2 communicat\*).ab,ti. OR (research adj2 communicat\*).ab,ti. OR (information adj2 acquisition).ab,ti. OR Health Communication/ OR Information Dissemination/ OR Health Promotion/) **AND** ("infographic\*".ab,ti. OR (data adj2 visuali?ation).ab,ti. OR (information adj2 graphic\*).ab,ti. OR (visual adj2 abstract\*).ab,ti. OR "datagraphic\*".ab,ti. OR (visual adj2 display).ab,ti. OR (visual adj2 graphic\*).ab,ti. OR (visual adj2 presentation\*).ab,ti. OR (visual adj2 stor\*).ab,ti. OR (graphic\* adj2 presentation\*).ab,ti. OR (information adj2 visuali?ation\*).ab,ti. OR (visual\* adj2 data).ab,ti. OR (graphic\* adj2 data).ab,ti. OR "info-graphic\*".ab,ti. OR data visualization/)
