# Supplementary material for: Use of infographics as a health-related knowledge translation tool: protocol for a scoping review
Source: PubMed Central journal article supplement — BMJ Open. 2021 Jun 16;11(6):e046117. doi: 10.1136/bmjopen-2020-046117 (PMC8211040; doi:10.1136/bmjopen-2020-046117), 2021-06-16
Supplement: bmjopen-2020-046117supp001.pdf [file bmjopen-2020-046117supp001.pdf]

---

**Appendix 1** | List of terms for the search strategy
 

---

| <b>TOOL</b><br>Terms related to <i>Infographic</i> | <b>PURPOSE</b><br>Terms related to <i>Knowledge translation</i> |
|----------------------------------------------------|-----------------------------------------------------------------|
| Infographic*                                       | Health communicat*                                              |
| Data visuali?ation                                 | Information translation                                         |
| Information graphic*                               | Knowledge translation                                           |
| Visual abstract*                                   | Knowledge transfer                                              |
| Visual display                                     | Health promotion                                                |
| Visual graphic*                                    | Health literacy                                                 |
| Visual presentation*                               | Health education                                                |
| Visual stor*                                       | Science communicat*                                             |
| Datagraphic*                                       | Scientific presentation*                                        |
| Graphic* presentation*                             | Research disseminat*                                            |
| Visual* data                                       | Research translation                                            |
| Information visuali?ation*                         | Research transfer                                               |
| Graphic* data                                      | Information disseminat*                                         |
| Info-graphic*                                      | Information communicat*                                         |
|                                                    | Research communicat*                                            |
|                                                    | Knowledge mobili?ation                                          |
|                                                    | Knowledge exchange                                              |
|                                                    | Knowledge broker*                                               |
|                                                    | Knowledge utili?ation                                           |
|                                                    | Knowledge use                                                   |
|                                                    | Research impact*                                                |
|                                                    | Research utili?ation                                            |
|                                                    | Evidence use                                                    |
|                                                    | Evidence-based                                                  |
|                                                    | Research literature                                             |
|                                                    | Medical research                                                |
|                                                    | Research evidence                                               |
|                                                    | Research data                                                   |
|                                                    | Scientific knowledge                                            |
|                                                    | Health information*                                             |
|                                                    | Research result*                                                |
|                                                    | Systematic review*                                              |
|                                                    | Medical literature                                              |
|                                                    | Information retention                                           |
|                                                    | Information acquisition                                         |

## Appendix 2 | Search strategy

---

**Database:** Ovid MEDLINE(R) <1946 to present>

**Searched online :** 21/07/2020

**Keywords (title and abstract) :**

**Search results:** 656

((research adj2 literature).ab,ti. OR (medical adj2 research).ab,ti. OR (research adj2 evidence).ab,ti. OR (research adj2 data).ab,ti. OR (scientific adj2 knowledge).ab,ti. OR (health adj2 information\*).ab,ti. OR (research adj2 result\*).ab,ti. OR (systematic adj2 review\*).ab,ti. OR (medical adj2 literature).ab,ti. OR (information adj2 retention).ab,ti. OR (information adj2 translation).ab,ti. OR (knowledge adj2 translation).ab,ti. OR (knowledge adj2 transfer).ab,ti. OR (health adj2 promotion).ab,ti. OR (health adj2 literacy).ab,ti. OR (health adj2 education).ab,ti. OR (health adj2 communicat\*).ab,ti. OR (science adj2 communicat\*).ab,ti. OR (scientific adj2 presentation\*).ab,ti. OR (research adj2 disseminat\*).ab,ti. OR (research adj2 translation).ab,ti. OR evidence-based.ab,ti. OR (evidence adj2 "use").ab,ti. OR (knowledge adj2 mobili?ation).ab,ti. OR (knowledge adj2 exchange).ab,ti. OR (knowledge adj2 broker\*).ab,ti. OR (knowledge adj2 utili?ation).ab,ti. OR (knowledge adj2 "use").ab,ti. OR (research adj2 impact\*).ab,ti. OR (research adj2 utili?ation).ab,ti. OR (research adj2 transfer).ab,ti. OR (information adj2 disseminat\*).ab,ti. OR (information adj2 communicat\*).ab,ti. OR (research adj2 communicat\*).ab,ti. OR (information adj2 acquisition).ab,ti. OR Health Communication/ OR Information Dissemination/ OR Health Promotion/) **AND** ("infographic\*.ab,ti. OR (data adj2 visuali?ation).ab,ti. OR (information adj2 graphic\*).ab,ti. OR (visual adj2 abstract\*).ab,ti. OR "datagraphic".ab,ti. OR (visual adj2 display).ab,ti. OR (visual adj2 graphic\*).ab,ti. OR (visual adj2 presentation\*).ab,ti. OR (visual adj2 stor\*).ab,ti. OR (graphic\* adj2 presentation\*).ab,ti. OR (information adj2 visuali?ation\*).ab,ti. OR (visual\* adj2 data).ab,ti. OR (graphic\* adj2 data).ab,ti. OR "info-graphic".ab,ti. OR data visualization/)
